# Supplementary material for: Shallow neural networks trained to detect collisions recover features of visual loom-selective neurons
Source: eLife journal article supplement (doi:10.7554/elife.72067), 2022-01-13

A

Trained with the original data set

Outward

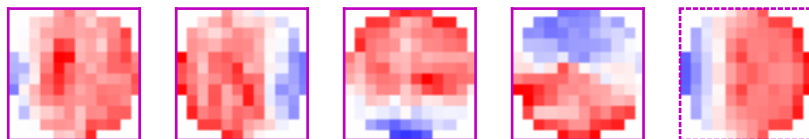

Inward

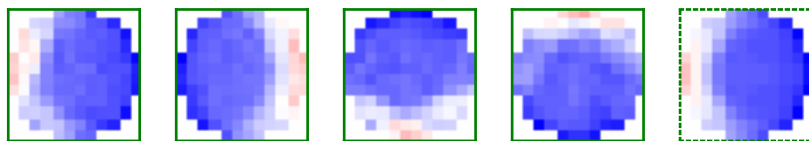

Trained with more data (eight-fold)

Outward

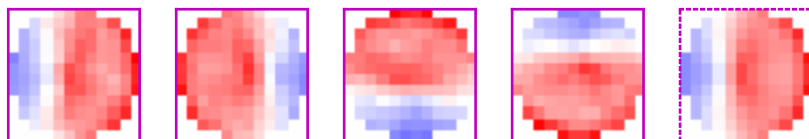

Inward

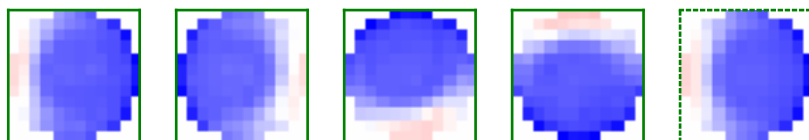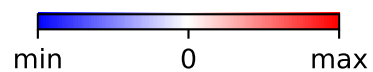

B

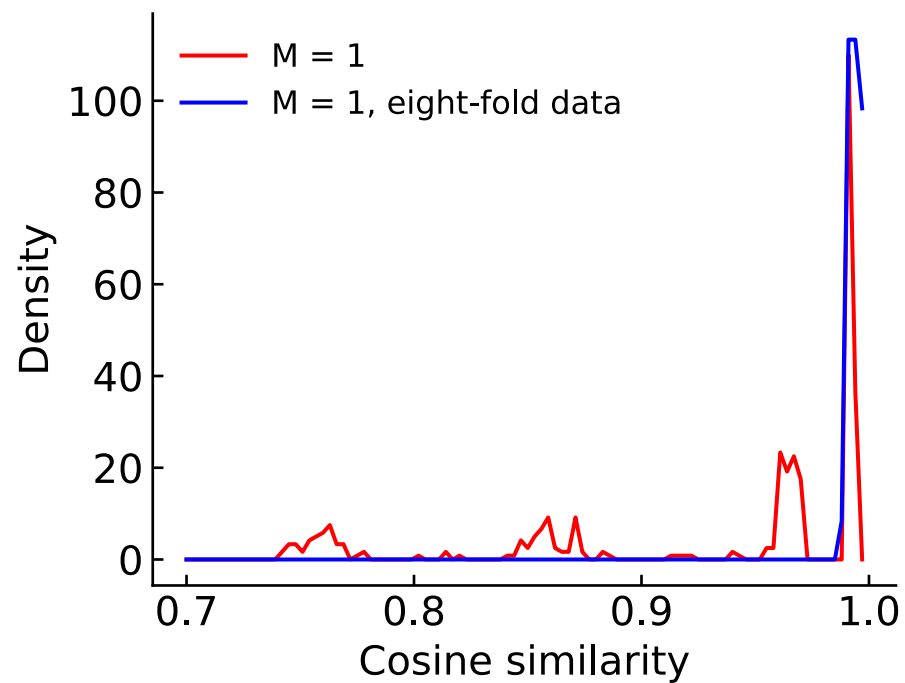

Supplement: supp [file elife-72067-supp-v1.zip]
