# Supplementary material for: Shallow neural networks trained to detect collisions recover features of visual loom-selective neurons
Source: eLife journal article supplement (doi:10.7554/elife.72067), 2022-01-13
Supplement: supp [file elife-72067-supp-v1.zip]

Archive with 33 entries (33 files):
- elife_poa_e72067_Video_1.mp4
- elife_poa_e72067_Video_2.mp4
- elife_poa_e72067_Video_3.mp4
- elife_poa_e72067_Video_4.mp4
- elife_poa_e72067_Video_5.mp4
- elife_poa_e72067_Video_6.mp4
- elife_poa_e72067_Video_7.mp4
- elife_poa_e72067_Video_8.mp4
- elife_poa_e72067_Video_9.mp4
- elife_poa_e72067_Video_10.mp4
- elife_poa_e72067_Video_11.mp4
- elife_poa_e72067_Video_12.mp4
- elife_poa_e72067_Transparent_Reporting_File.docx
- elife_poa_e72067_Figure_3_figure_supplement_1.pdf
- elife_poa_e72067_Figure_4_figure_supplement_1.pdf
- elife_poa_e72067_Figure_5_figure_supplement_1.pdf
- elife_poa_e72067_Figure_5_figure_supplement_2.pdf
- elife_poa_e72067_Figure_5_figure_supplement_3.pdf
- elife_poa_e72067_Figure_6_figure_supplement_1.pdf
- elife_poa_e72067_Figure_6_figure_supplement_2.pdf
- elife_poa_e72067_Figure_6_figure_supplement_3.pdf
- elife_poa_e72067_Figure_6_figure_supplement_4.pdf
- elife_poa_e72067_Figure_7_figure_supplement_1.pdf
- elife_poa_e72067_Figure_8_figure_supplement_1.pdf
- elife_poa_e72067_Figure_8_figure_supplement_2.pdf
- elife_poa_e72067_Figure_8_figure_supplement_3.pdf
- elife_poa_e72067_Figure_9_figure_supplement_1.pdf
- elife_poa_e72067_Figure_9_figure_supplement_2.pdf
- elife_poa_e72067_Figure_9_figure_supplement_3.pdf
- elife_poa_e72067_Figure_10_figure_supplement_1.pdf
- elife_poa_e72067_Figure_10_figure_supplement_2.pdf
- elife_poa_e72067_Figure_10_figure_supplement_3.pdf
- elife_poa_e72067_Figure_10_figure_supplement_4.pdf
