# Supplementary figures and images for: Shallow neural networks trained to detect collisions recover features of visual loom-selective neurons
Source: eLife journal article supplement (doi:10.7554/elife.72067), 2022-01-13

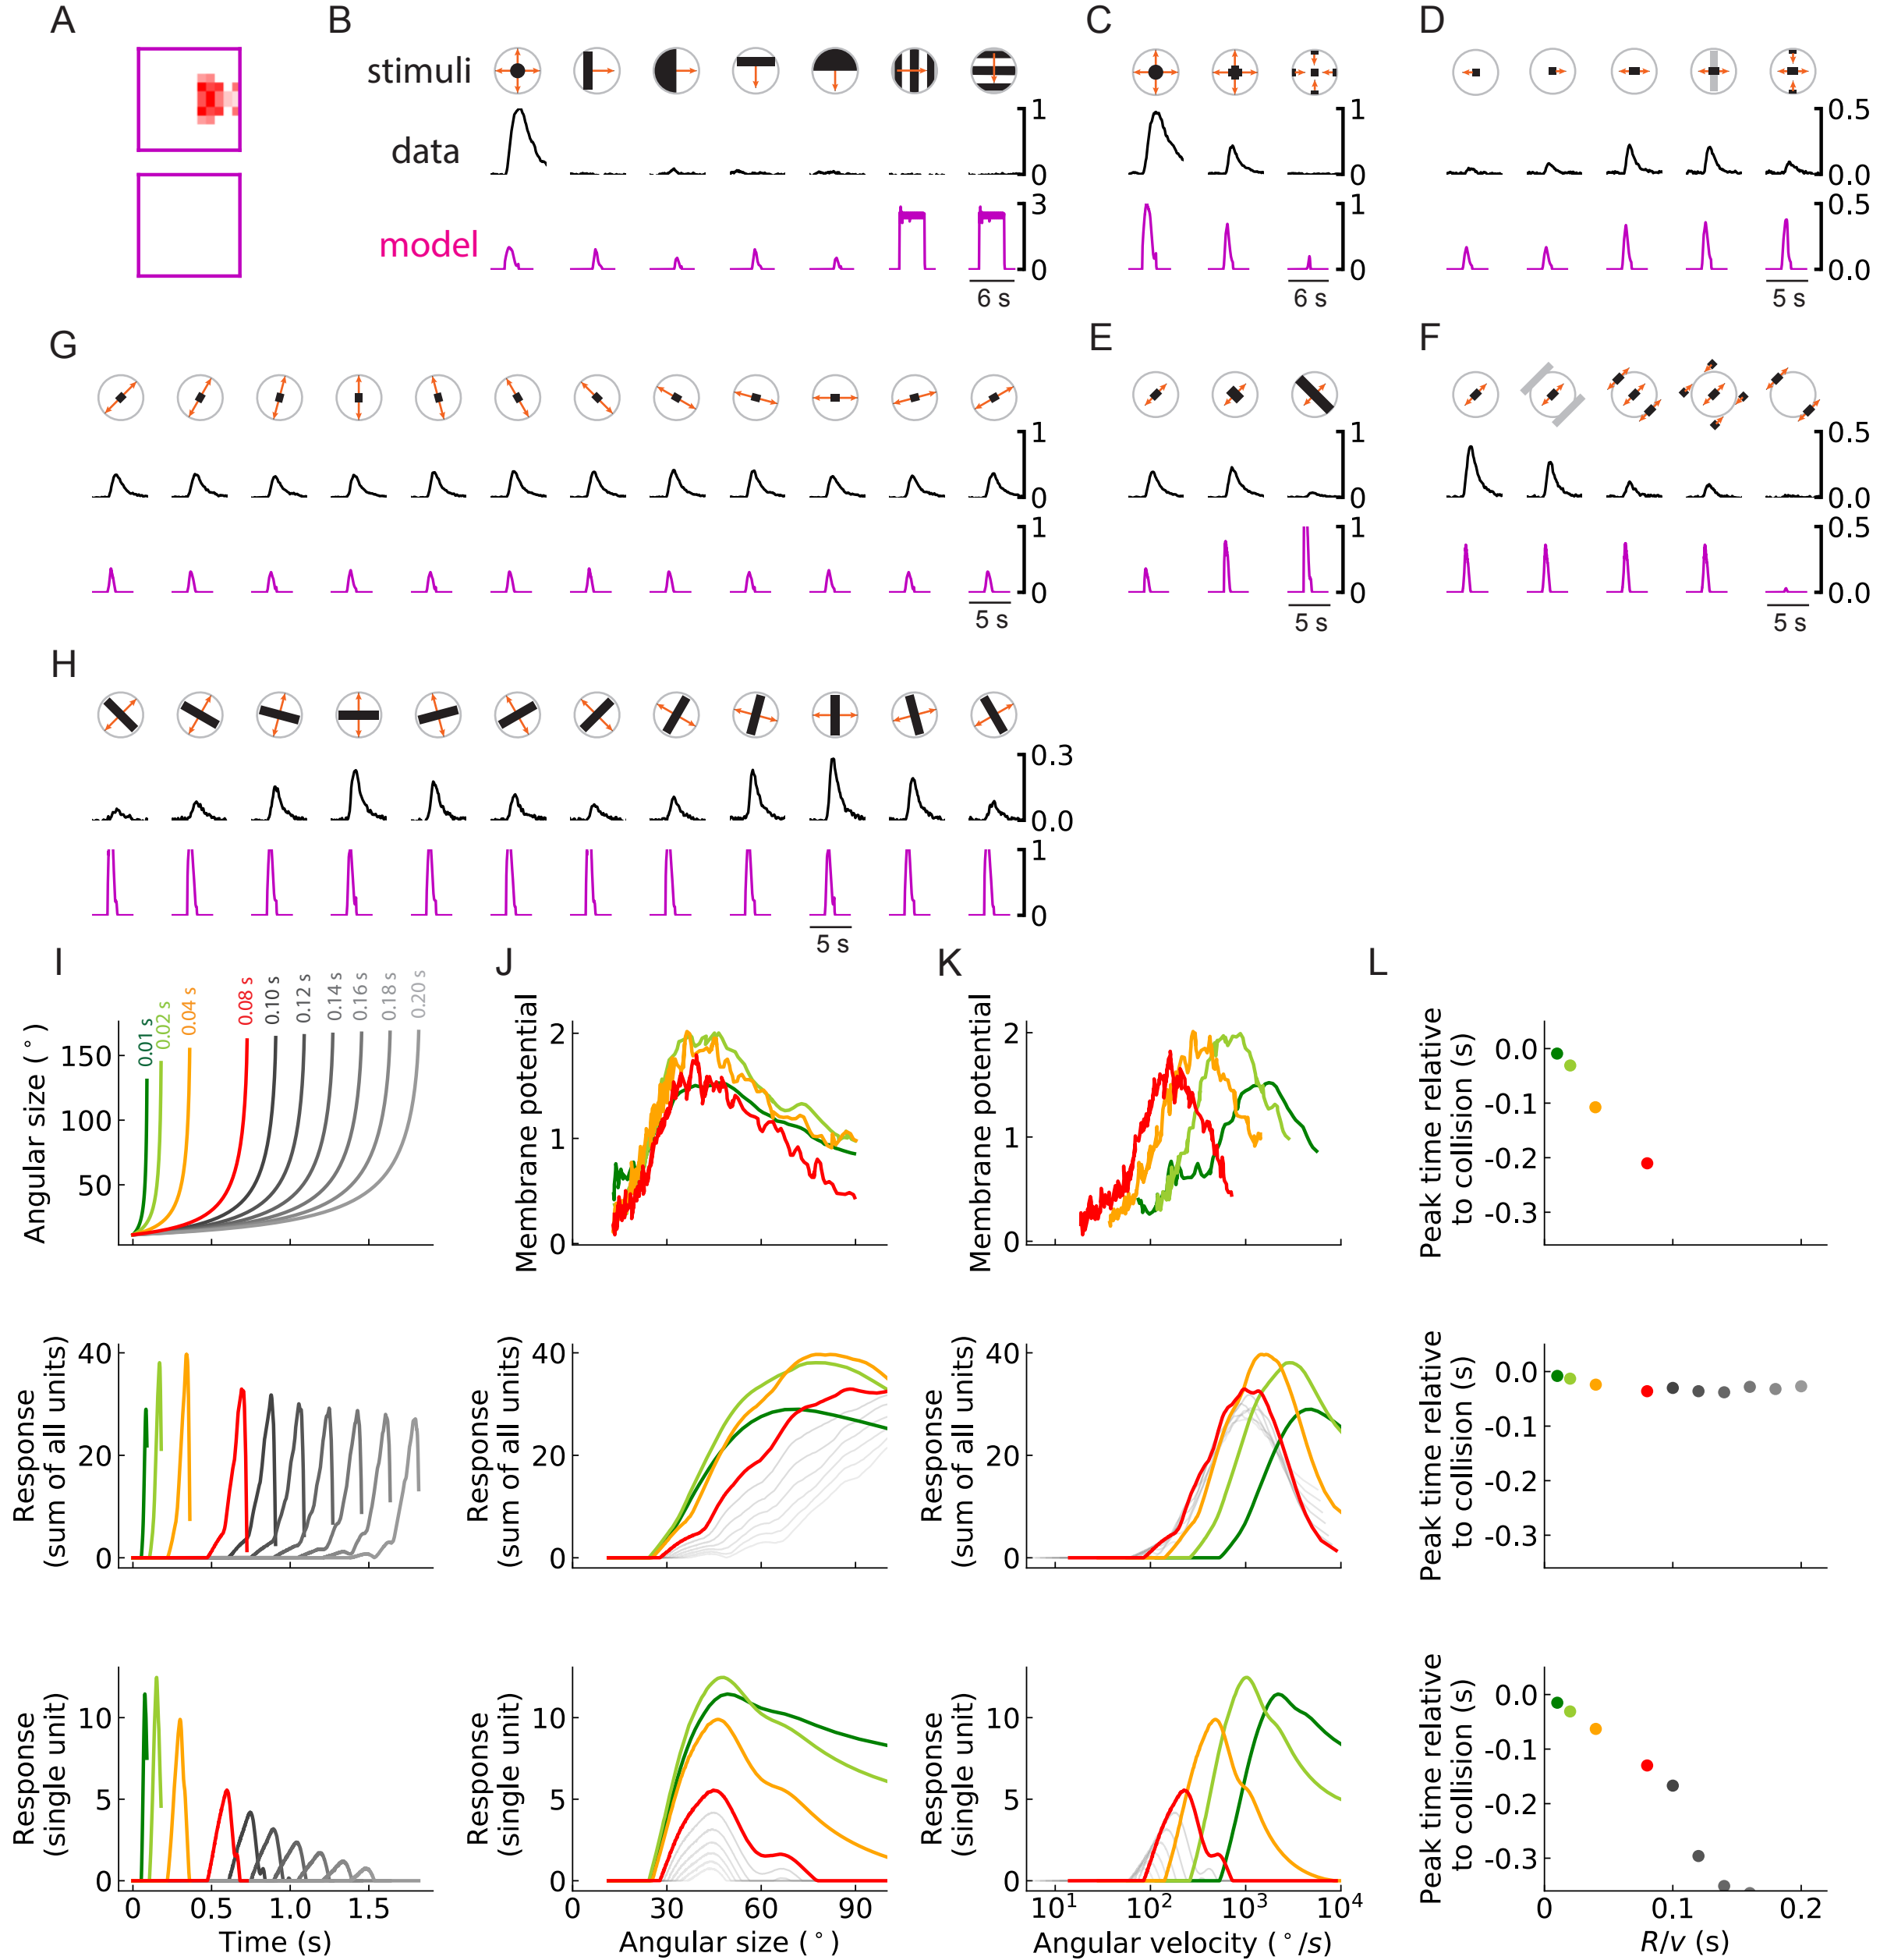

Supplement: supp [file elife-72067-supp-v1.zip]

Outward

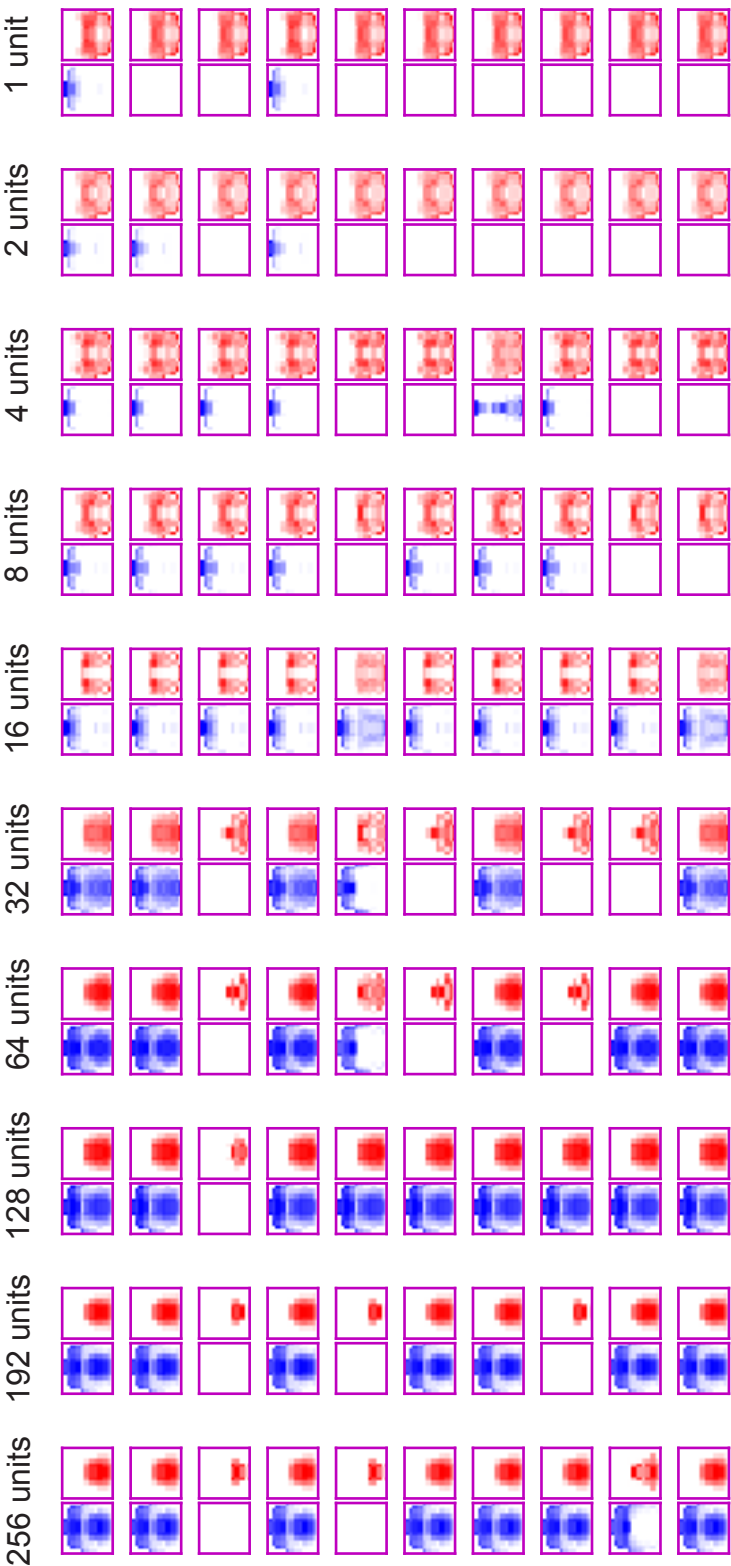

Inward

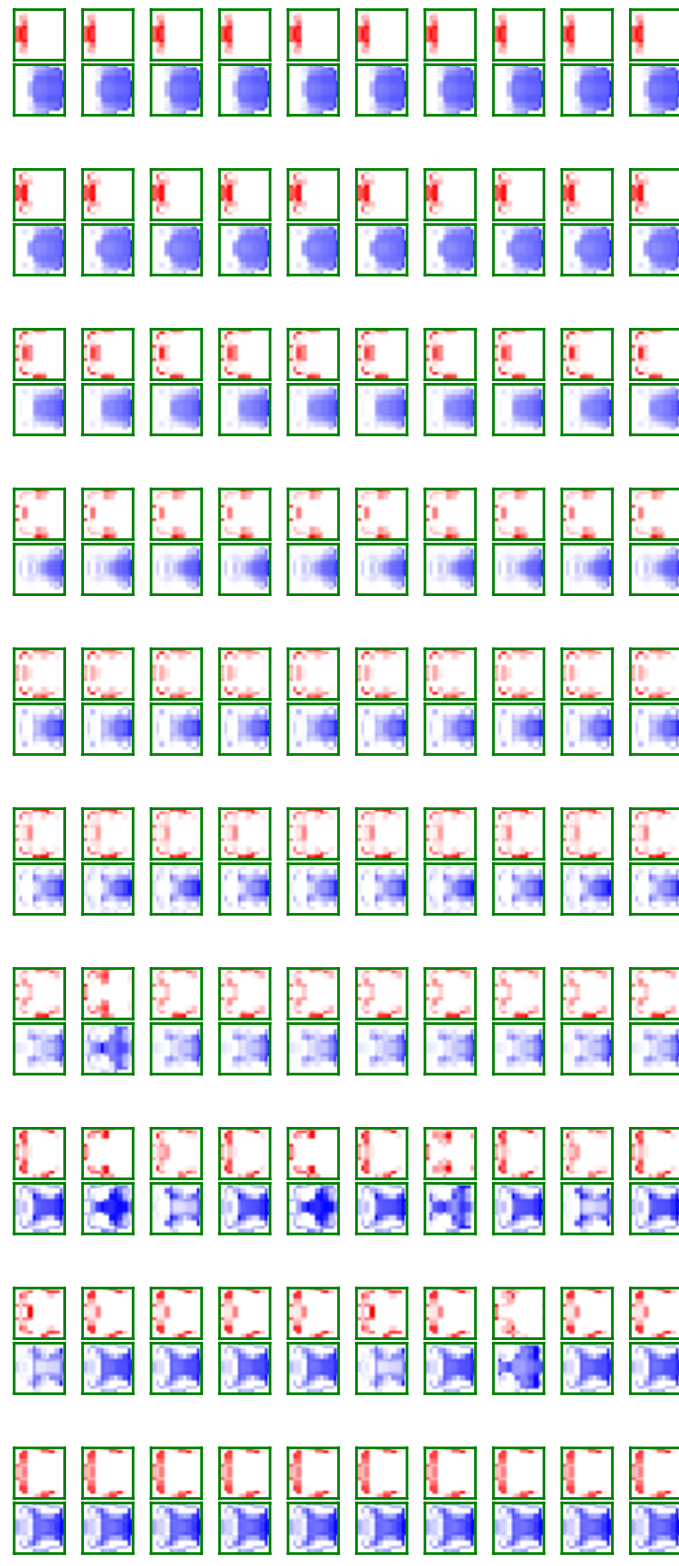

Supplement: supp [file elife-72067-supp-v1.zip]

Outward

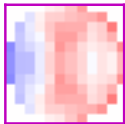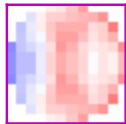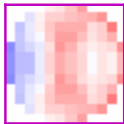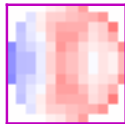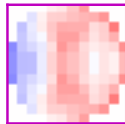

Inward

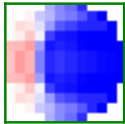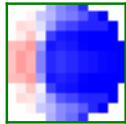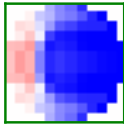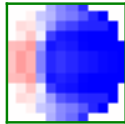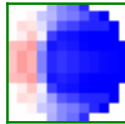

Zero

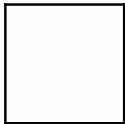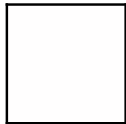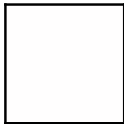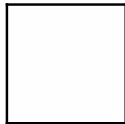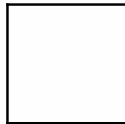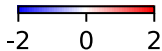

Supplement: supp [file elife-72067-supp-v1.zip]

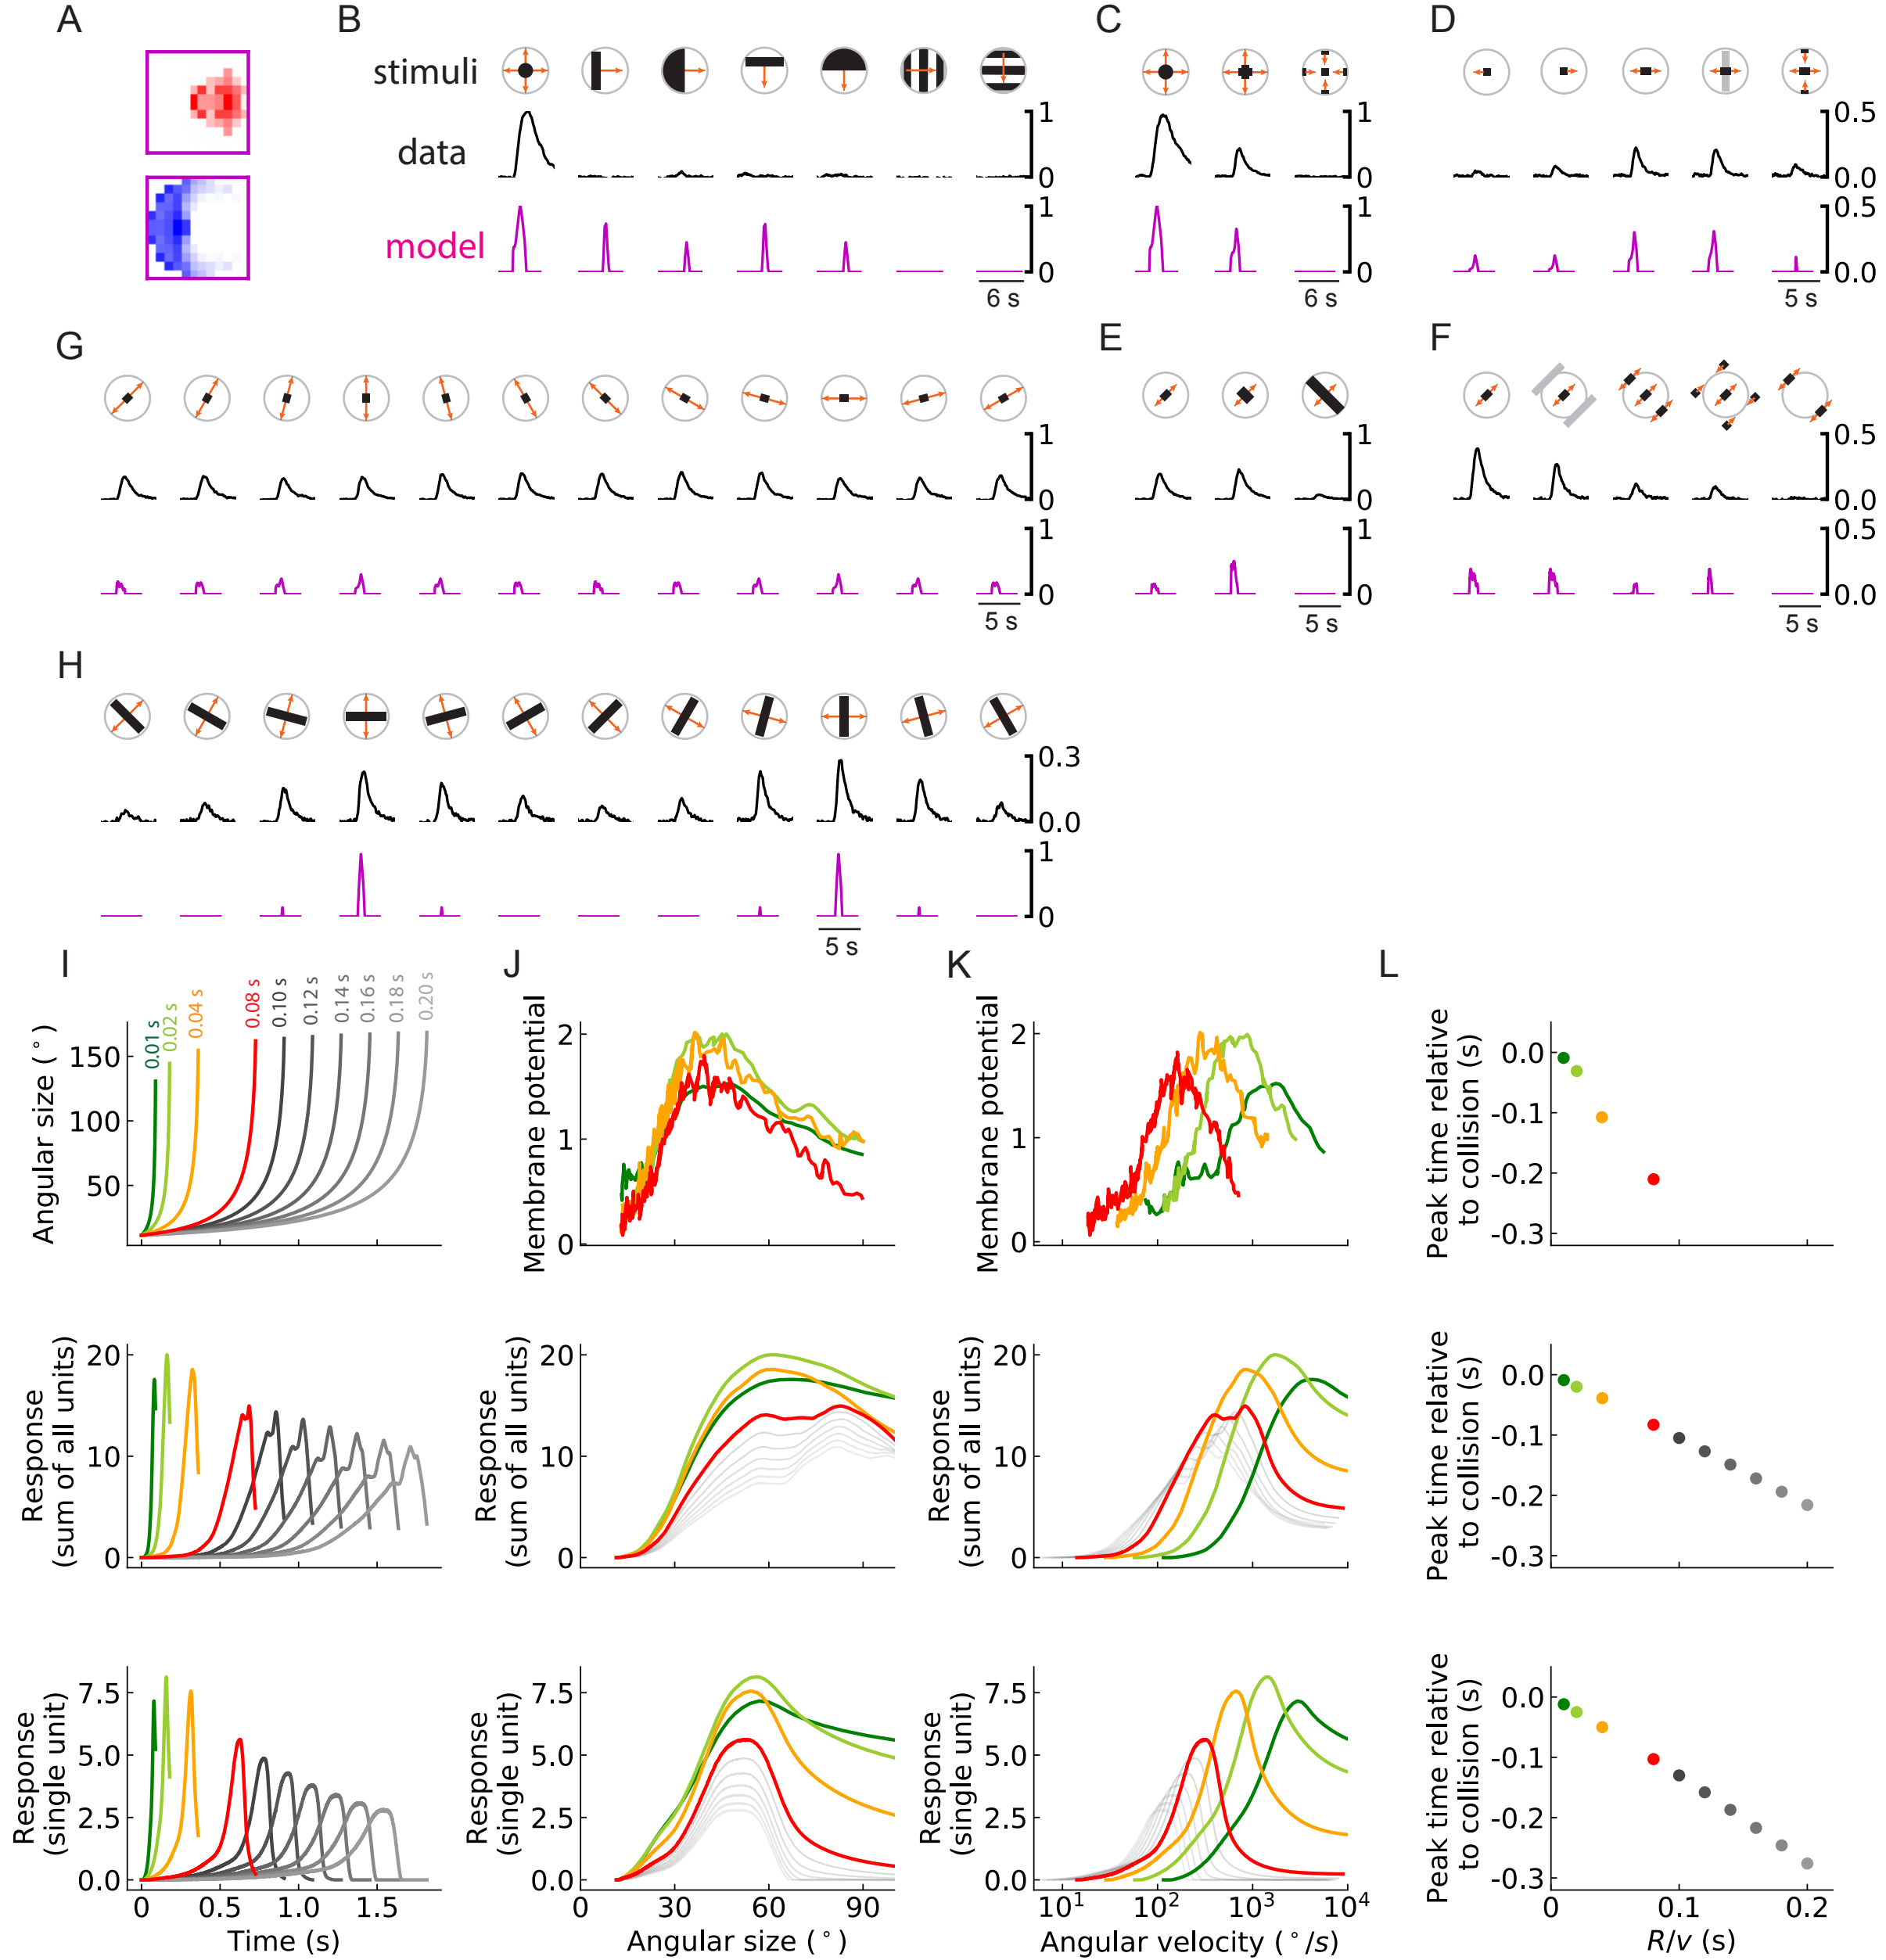

Supplement: supp [file elife-72067-supp-v1.zip]

A

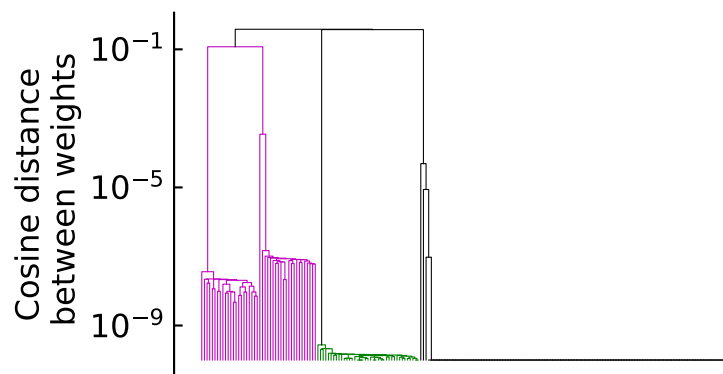

B

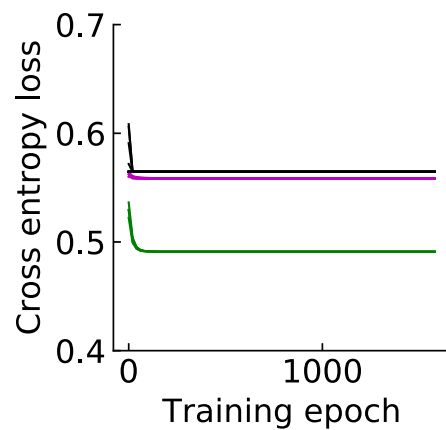

C

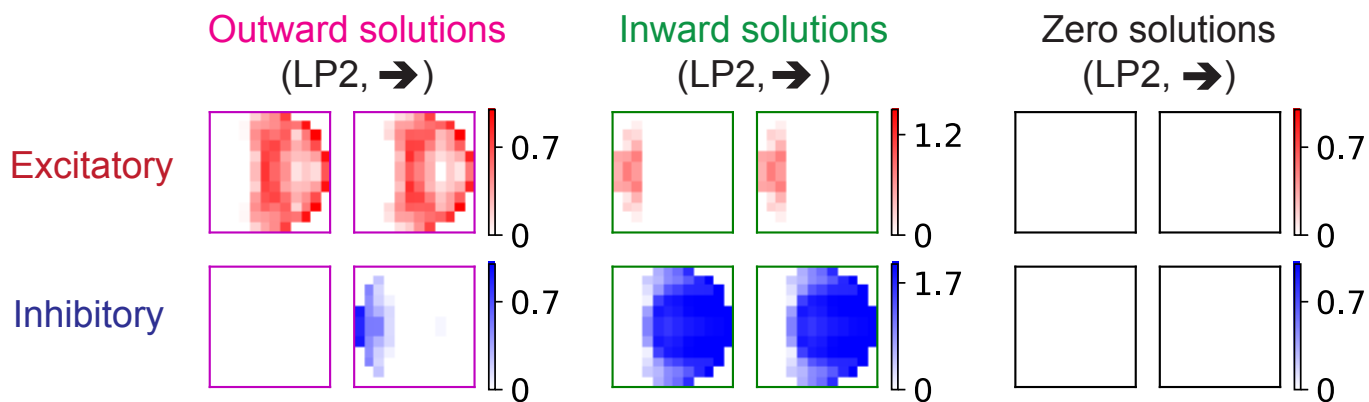

D

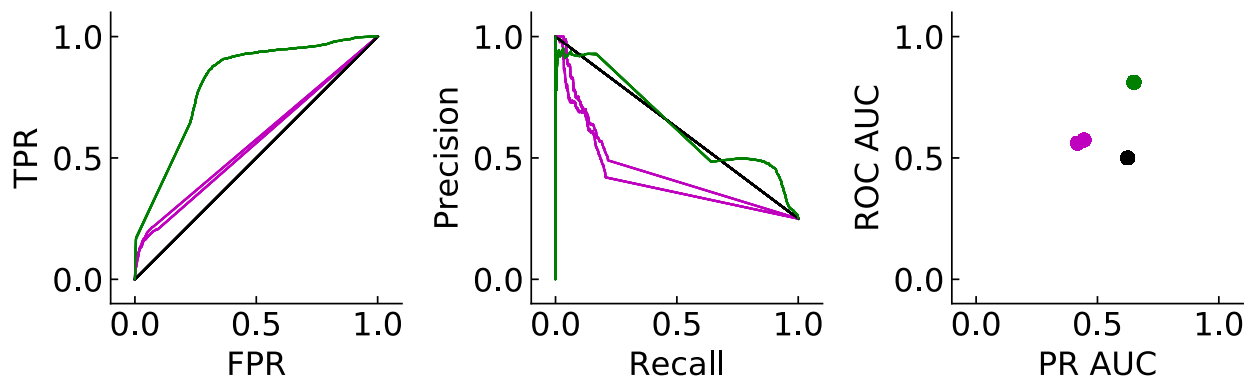

Supplement: supp [file elife-72067-supp-v1.zip]

A

Outward, 32 units

Azimuth (rad)

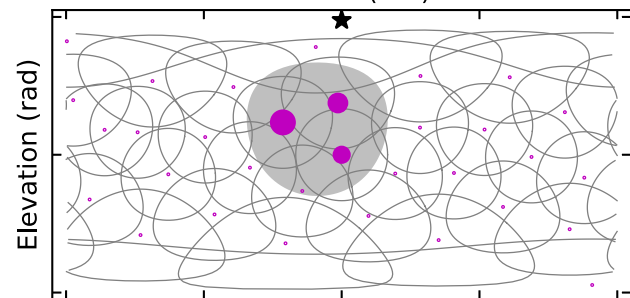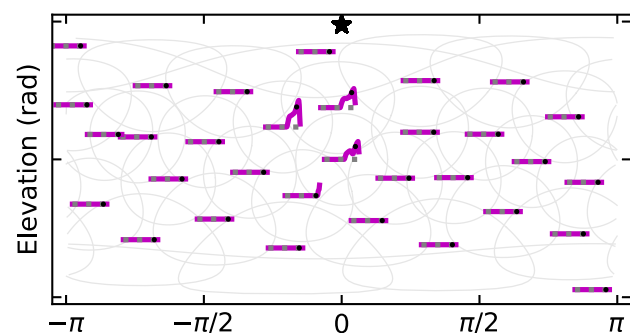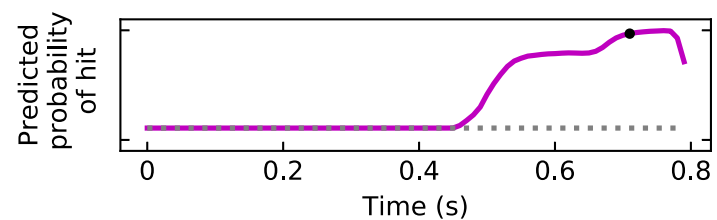

Inward, 32 units

Azimuth (rad)

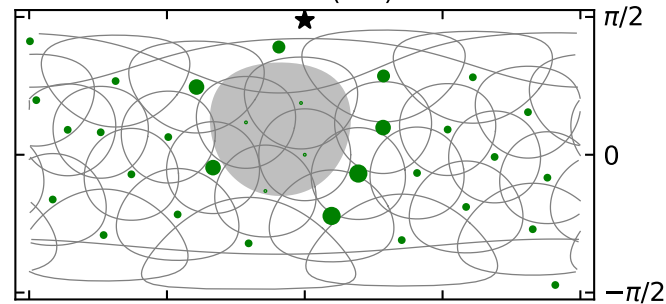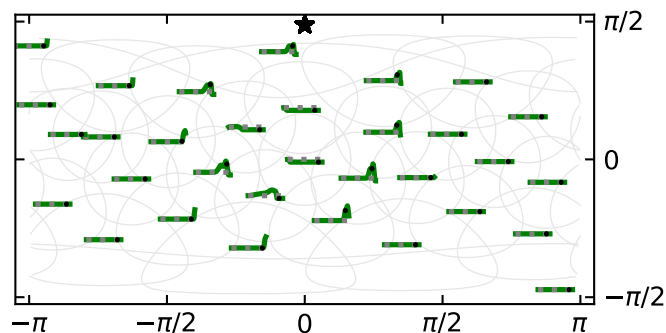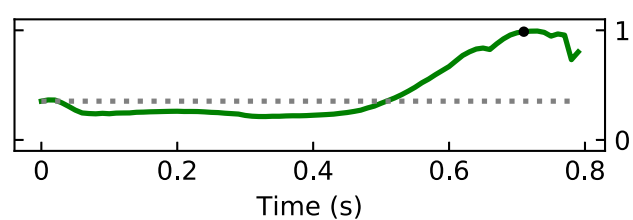

B

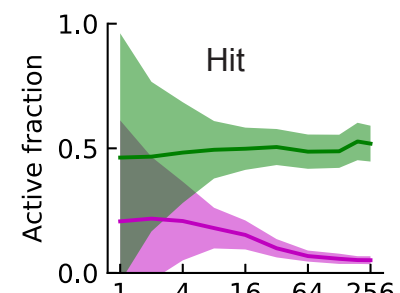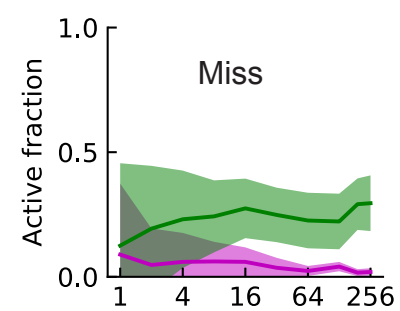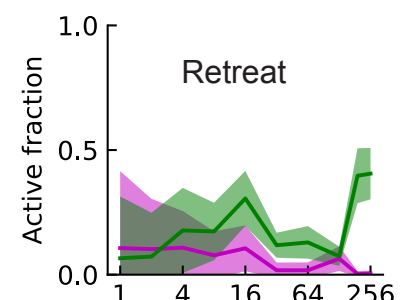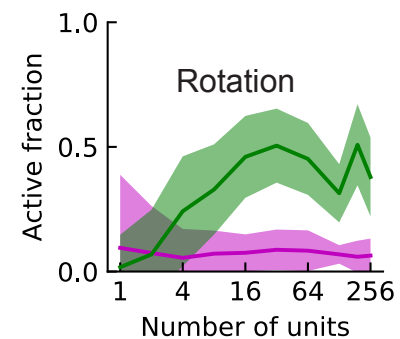

C

32 units

256 units

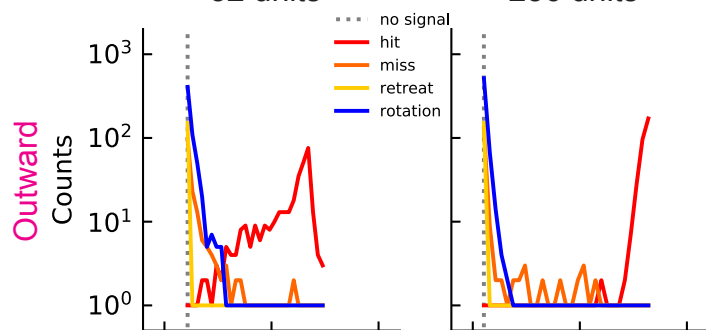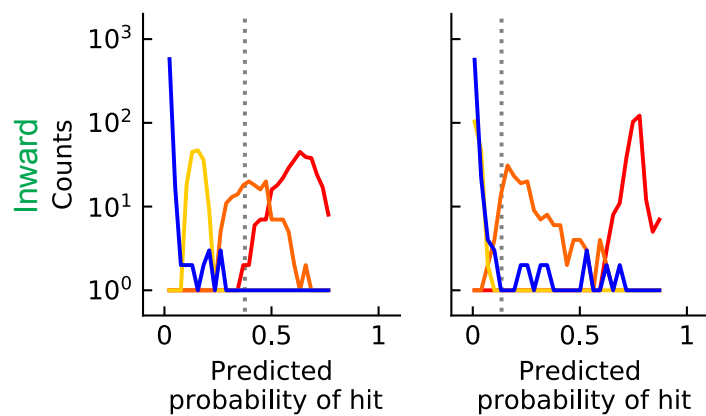

D

32 units

256 units

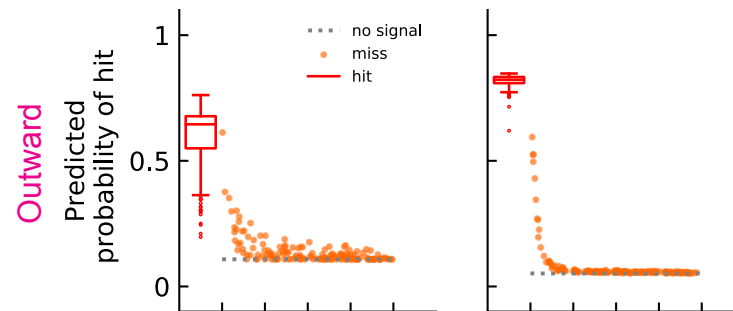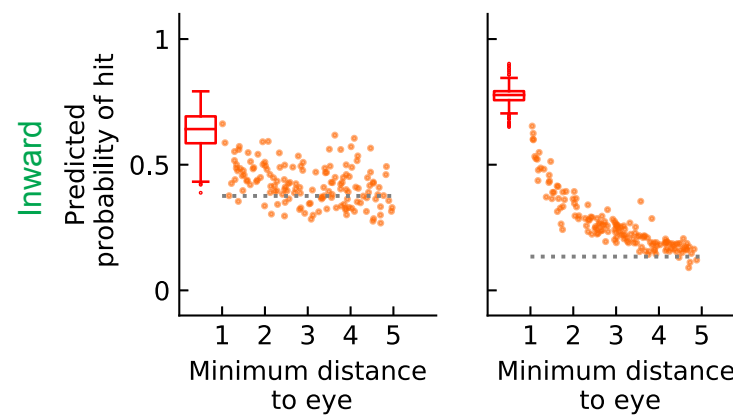

Supplement: supp [file elife-72067-supp-v1.zip]

A

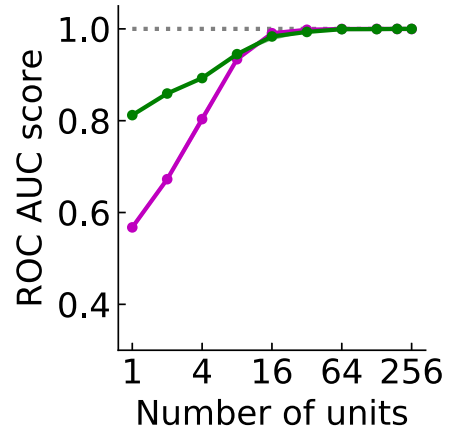

B

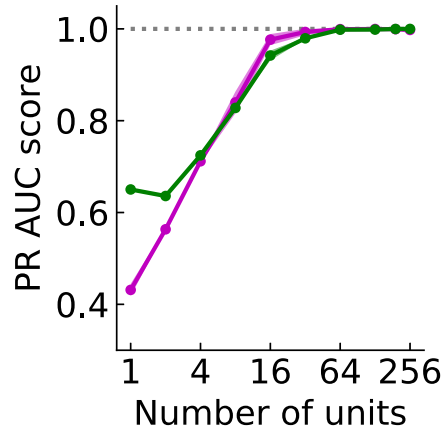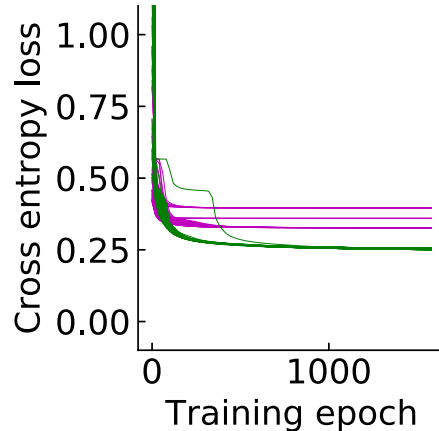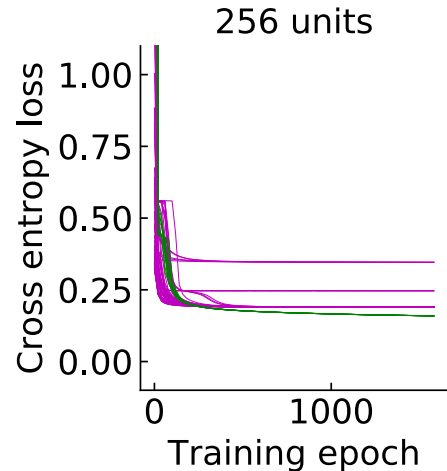

Supplement: supp [file elife-72067-supp-v1.zip]

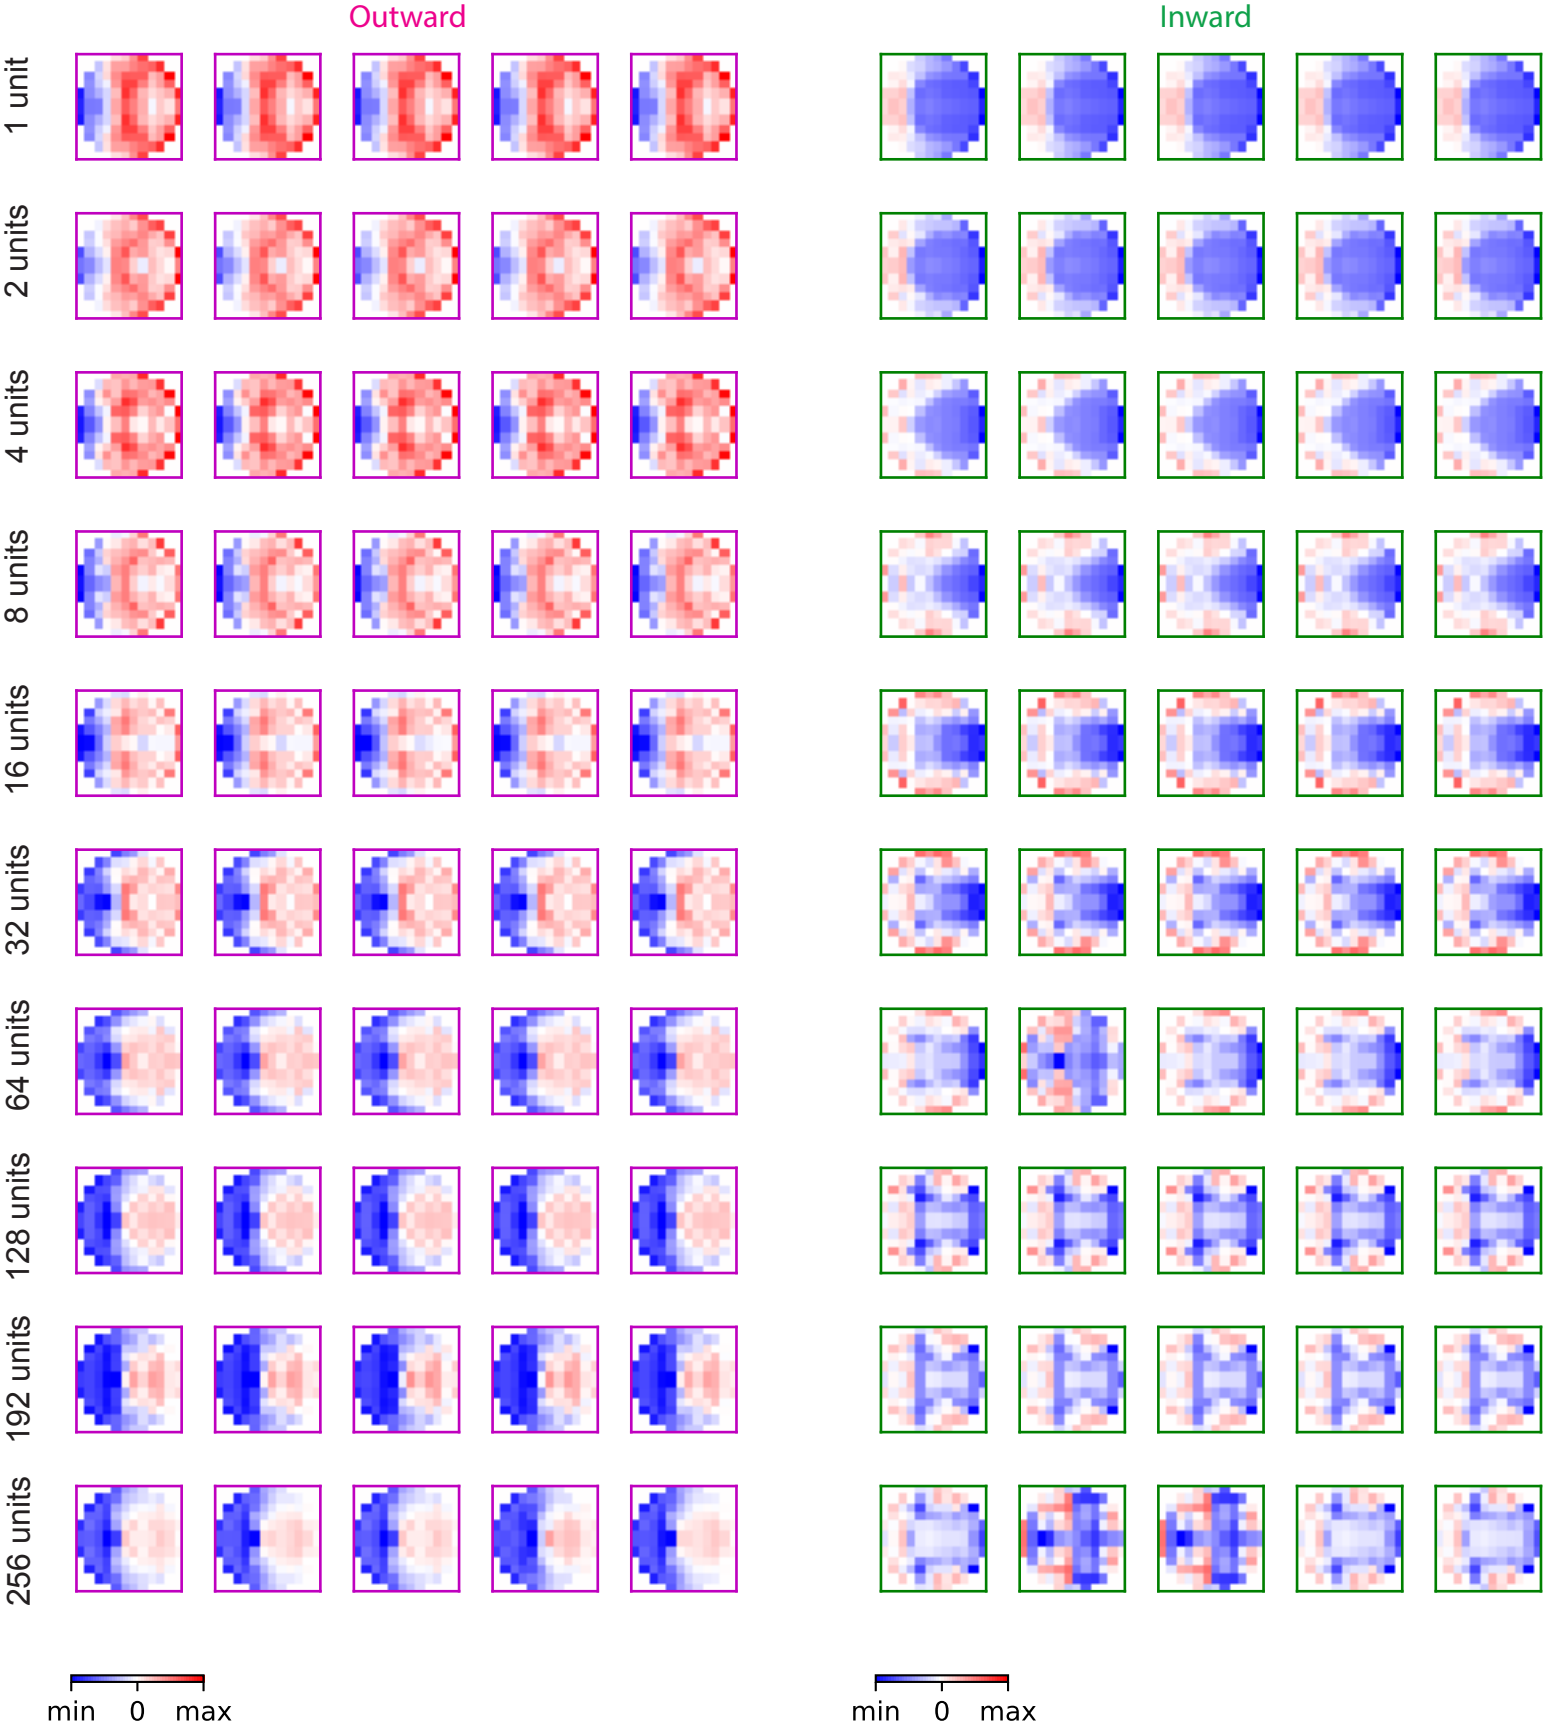

Supplement: supp [file elife-72067-supp-v1.zip]

A

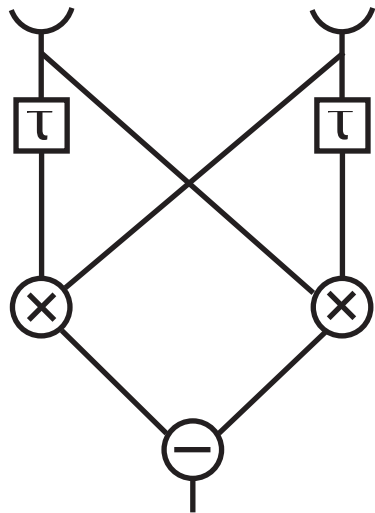

B

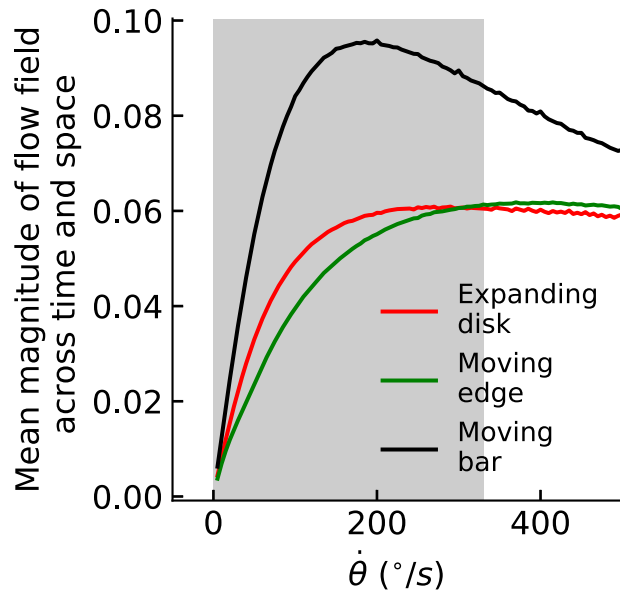

C

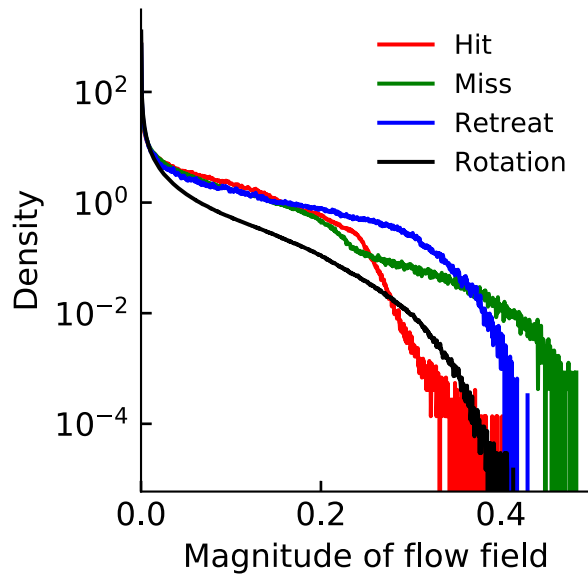

Supplement: supp [file elife-72067-supp-v1.zip]

A

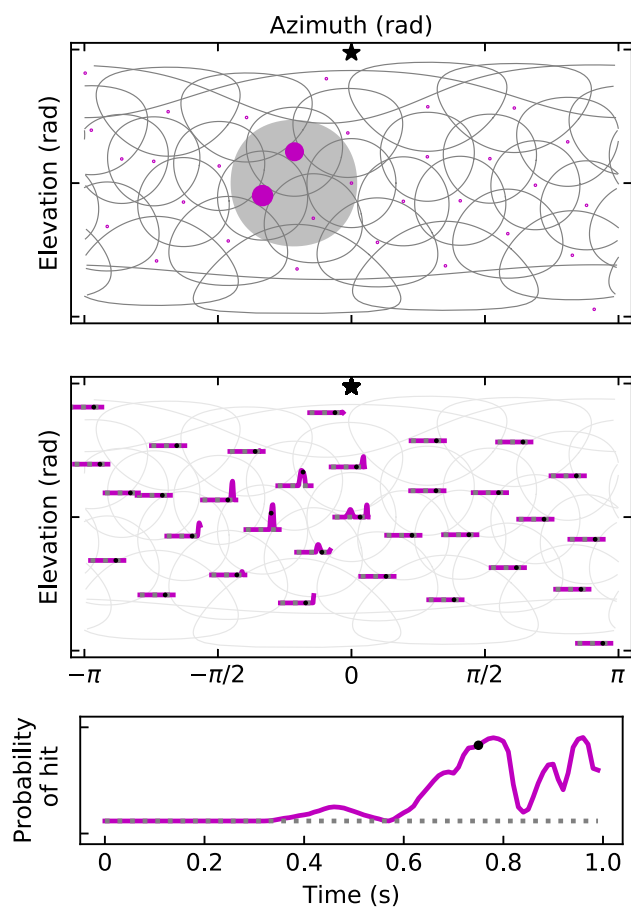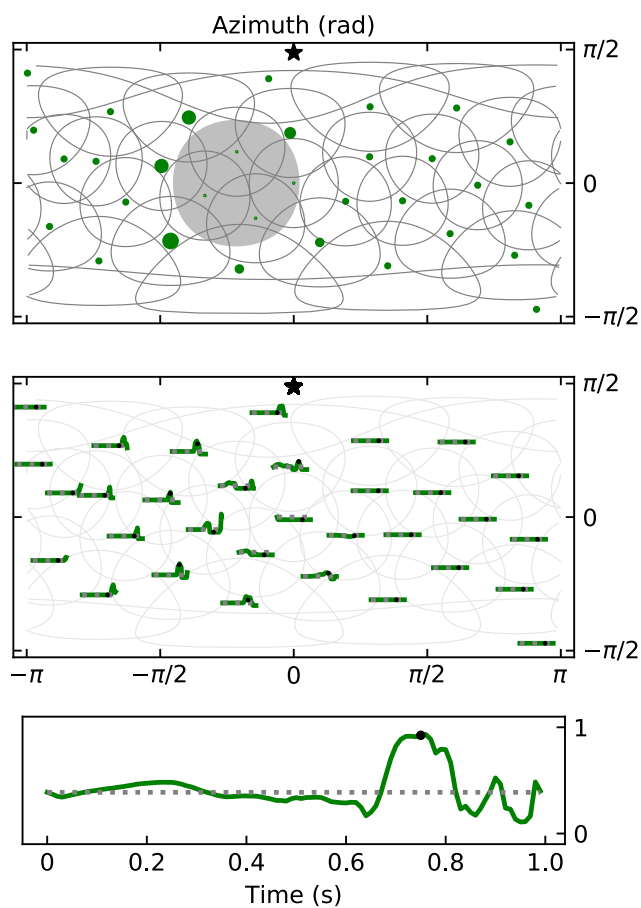

B

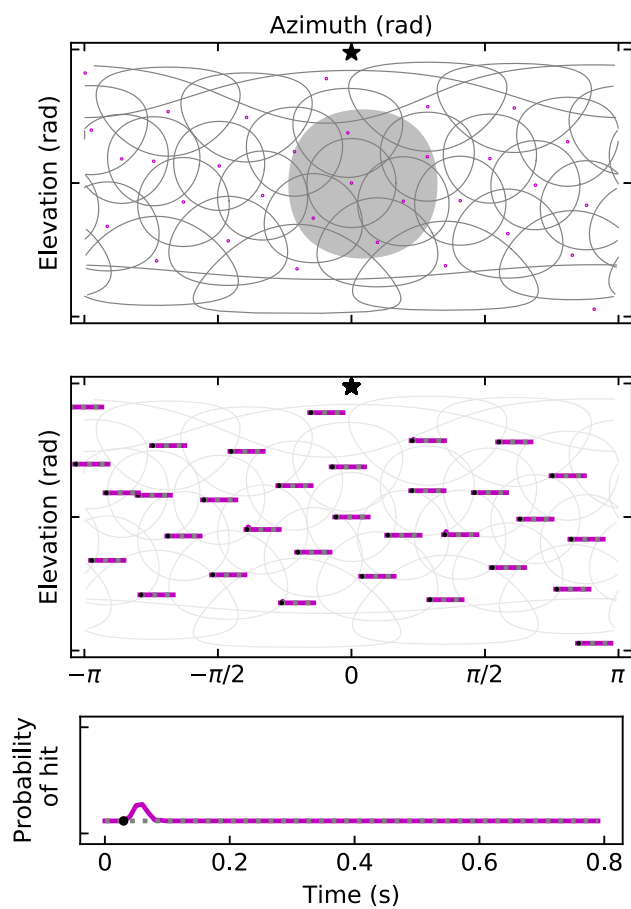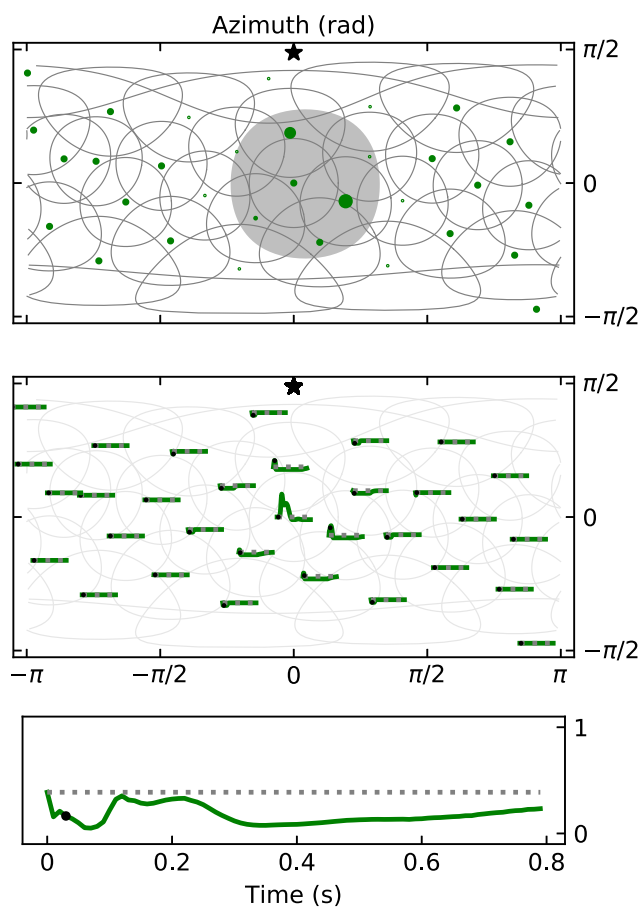

Supplement: supp [file elife-72067-supp-v1.zip]

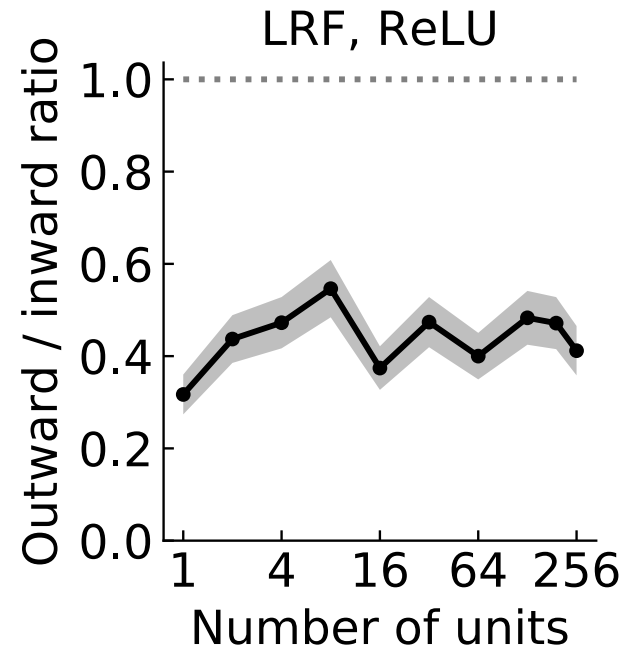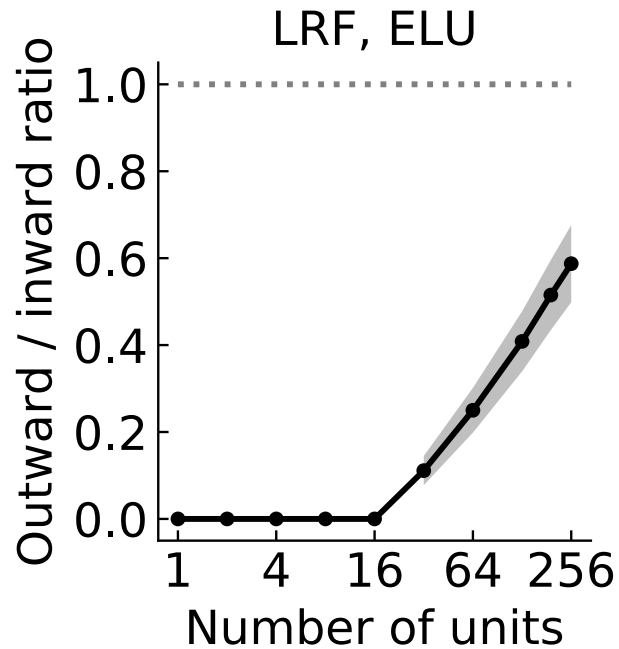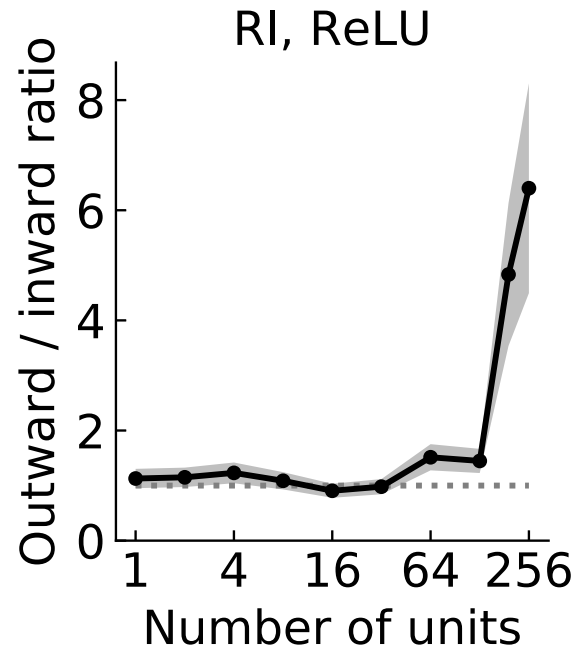

Supplement: supp [file elife-72067-supp-v1.zip]

2 units

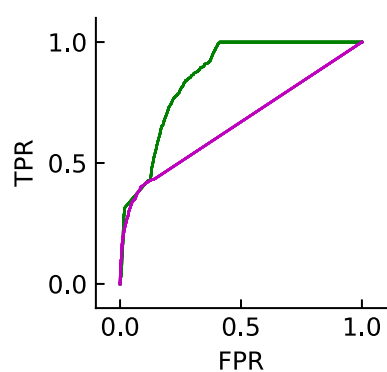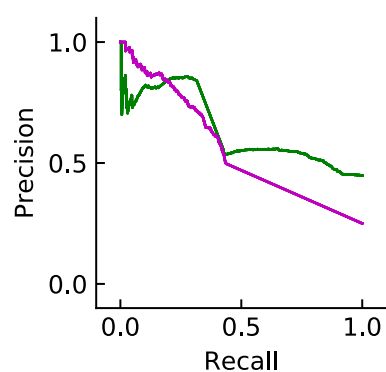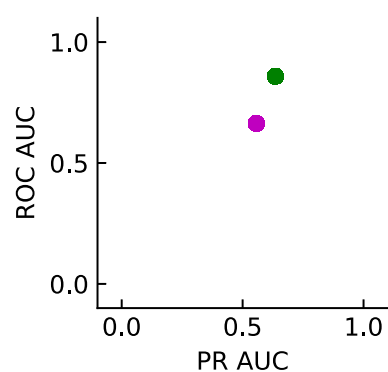

8 units

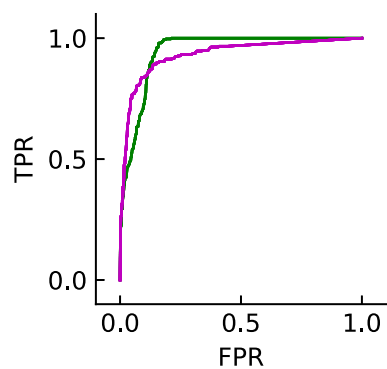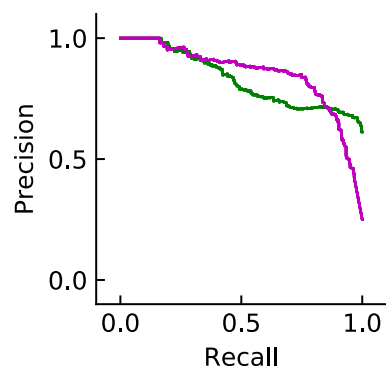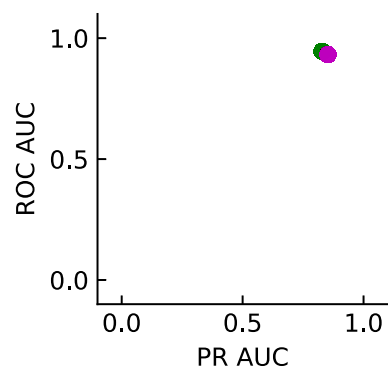

32 units

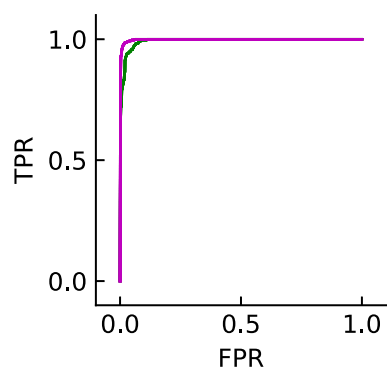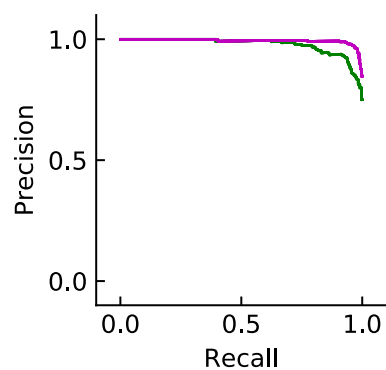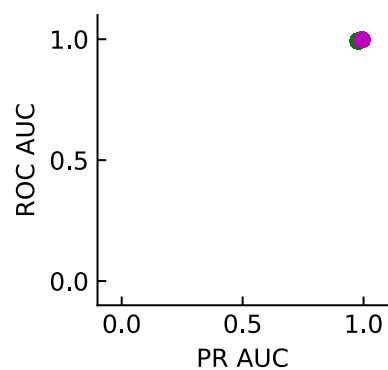

64 units

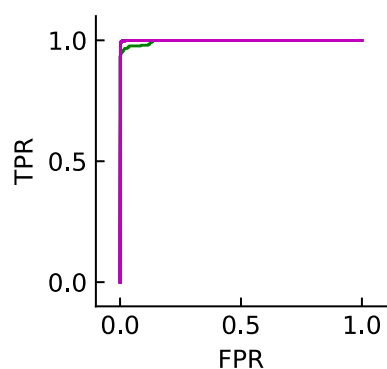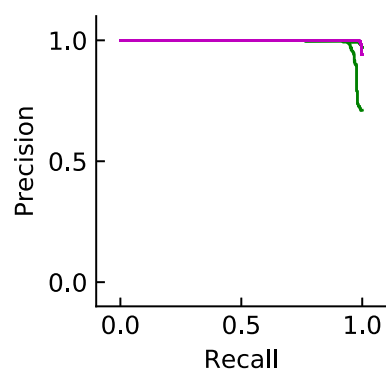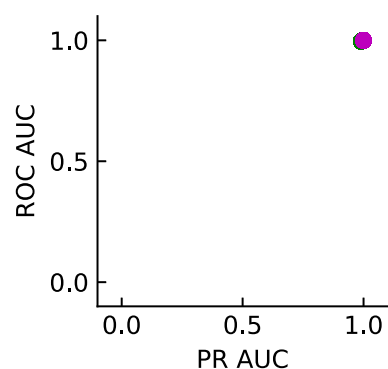

256 units

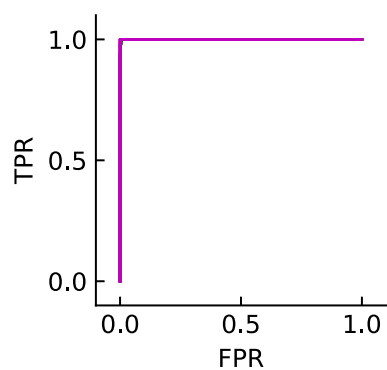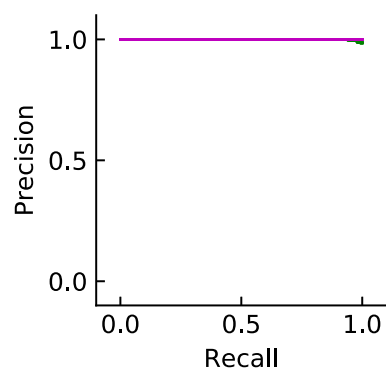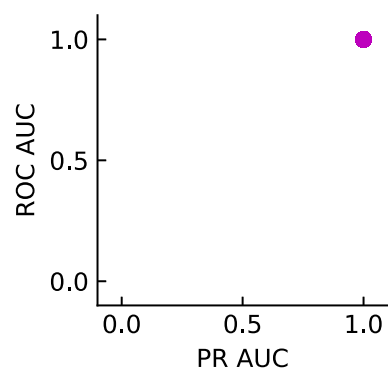

Supplement: supp [file elife-72067-supp-v1.zip]

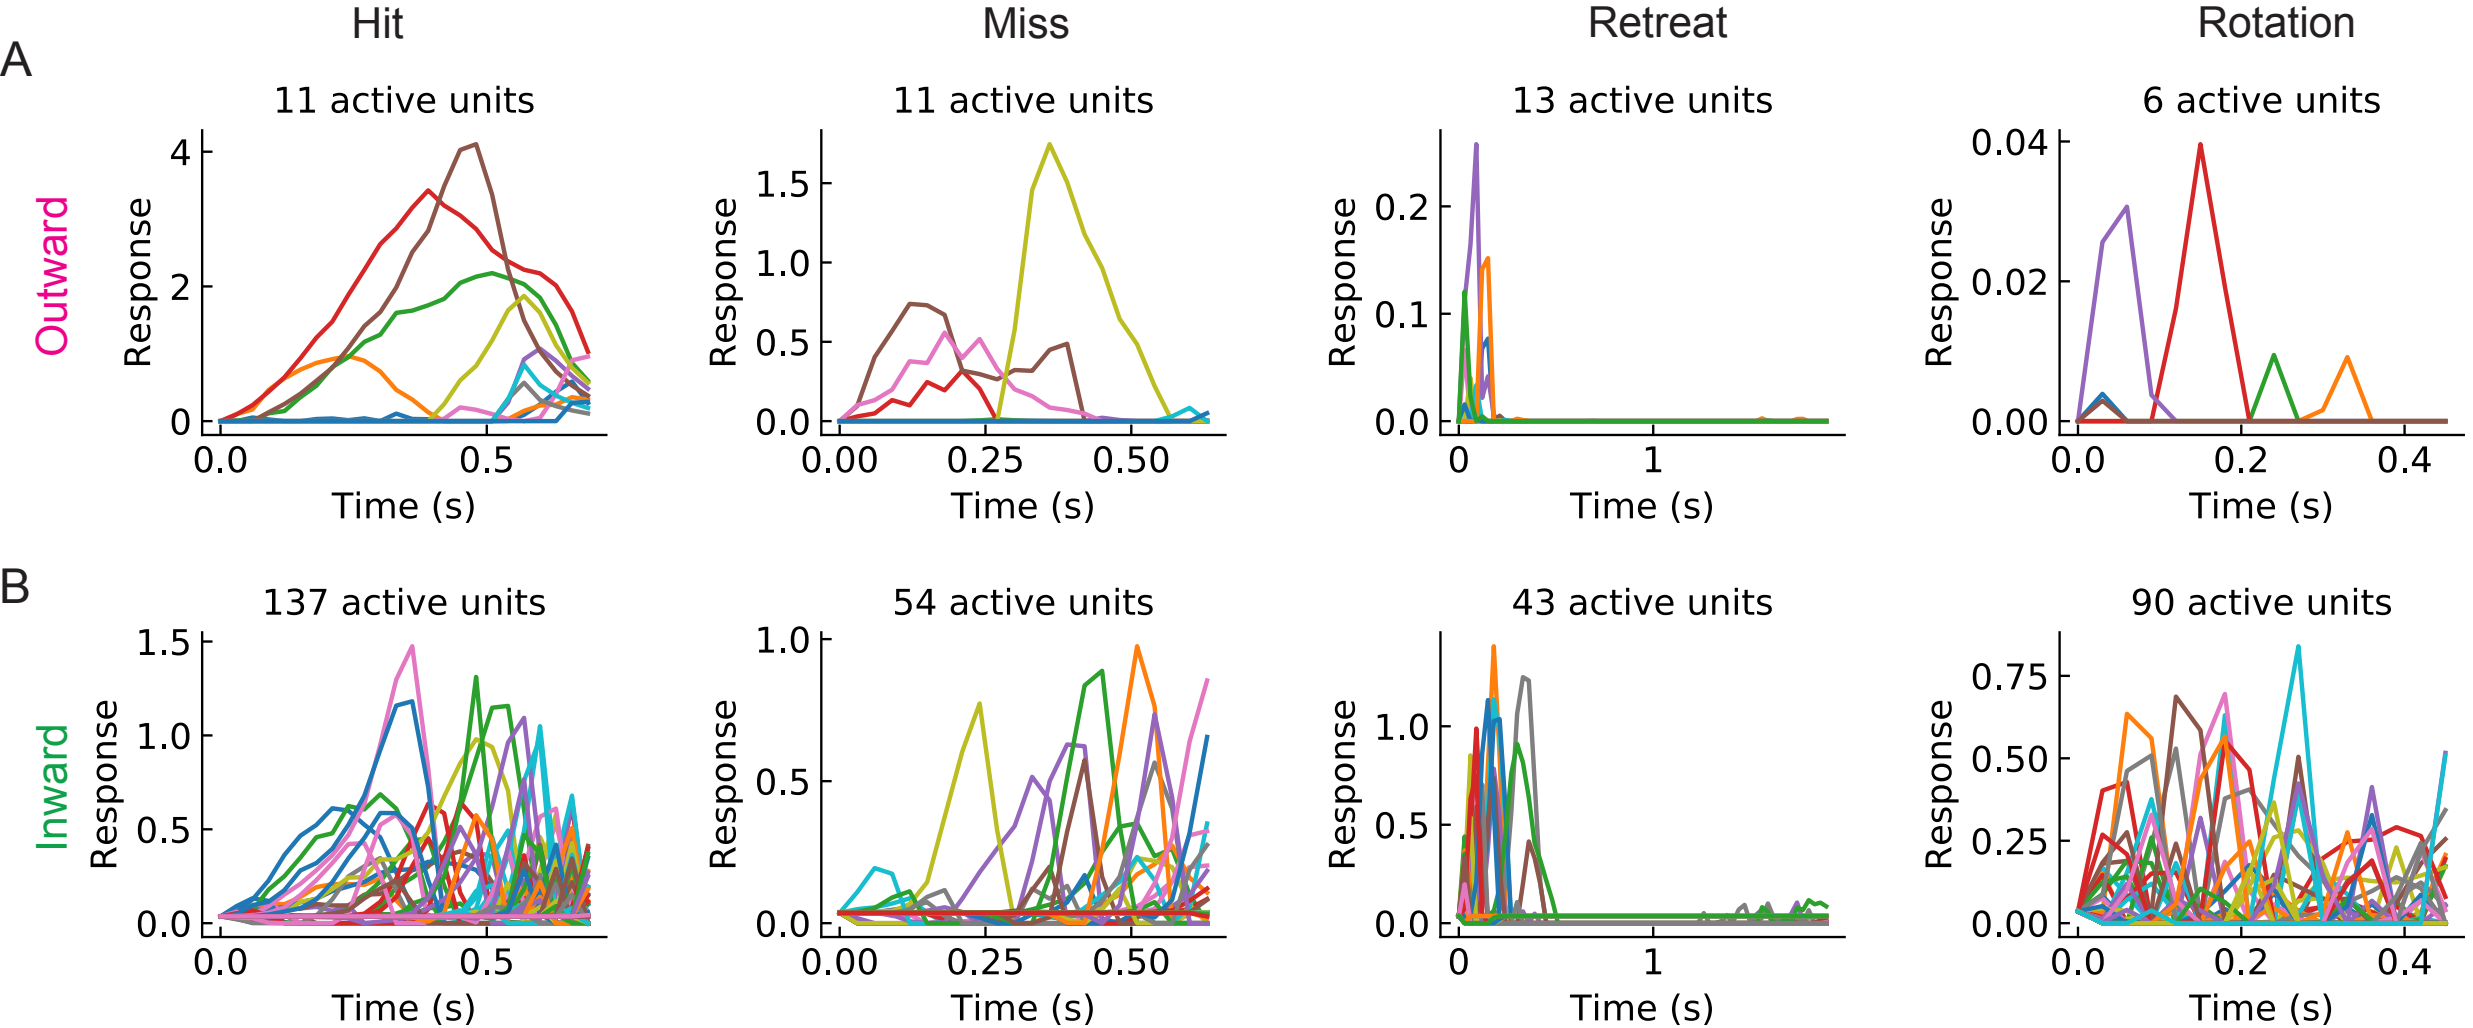

Supplement: supp [file elife-72067-supp-v1.zip]

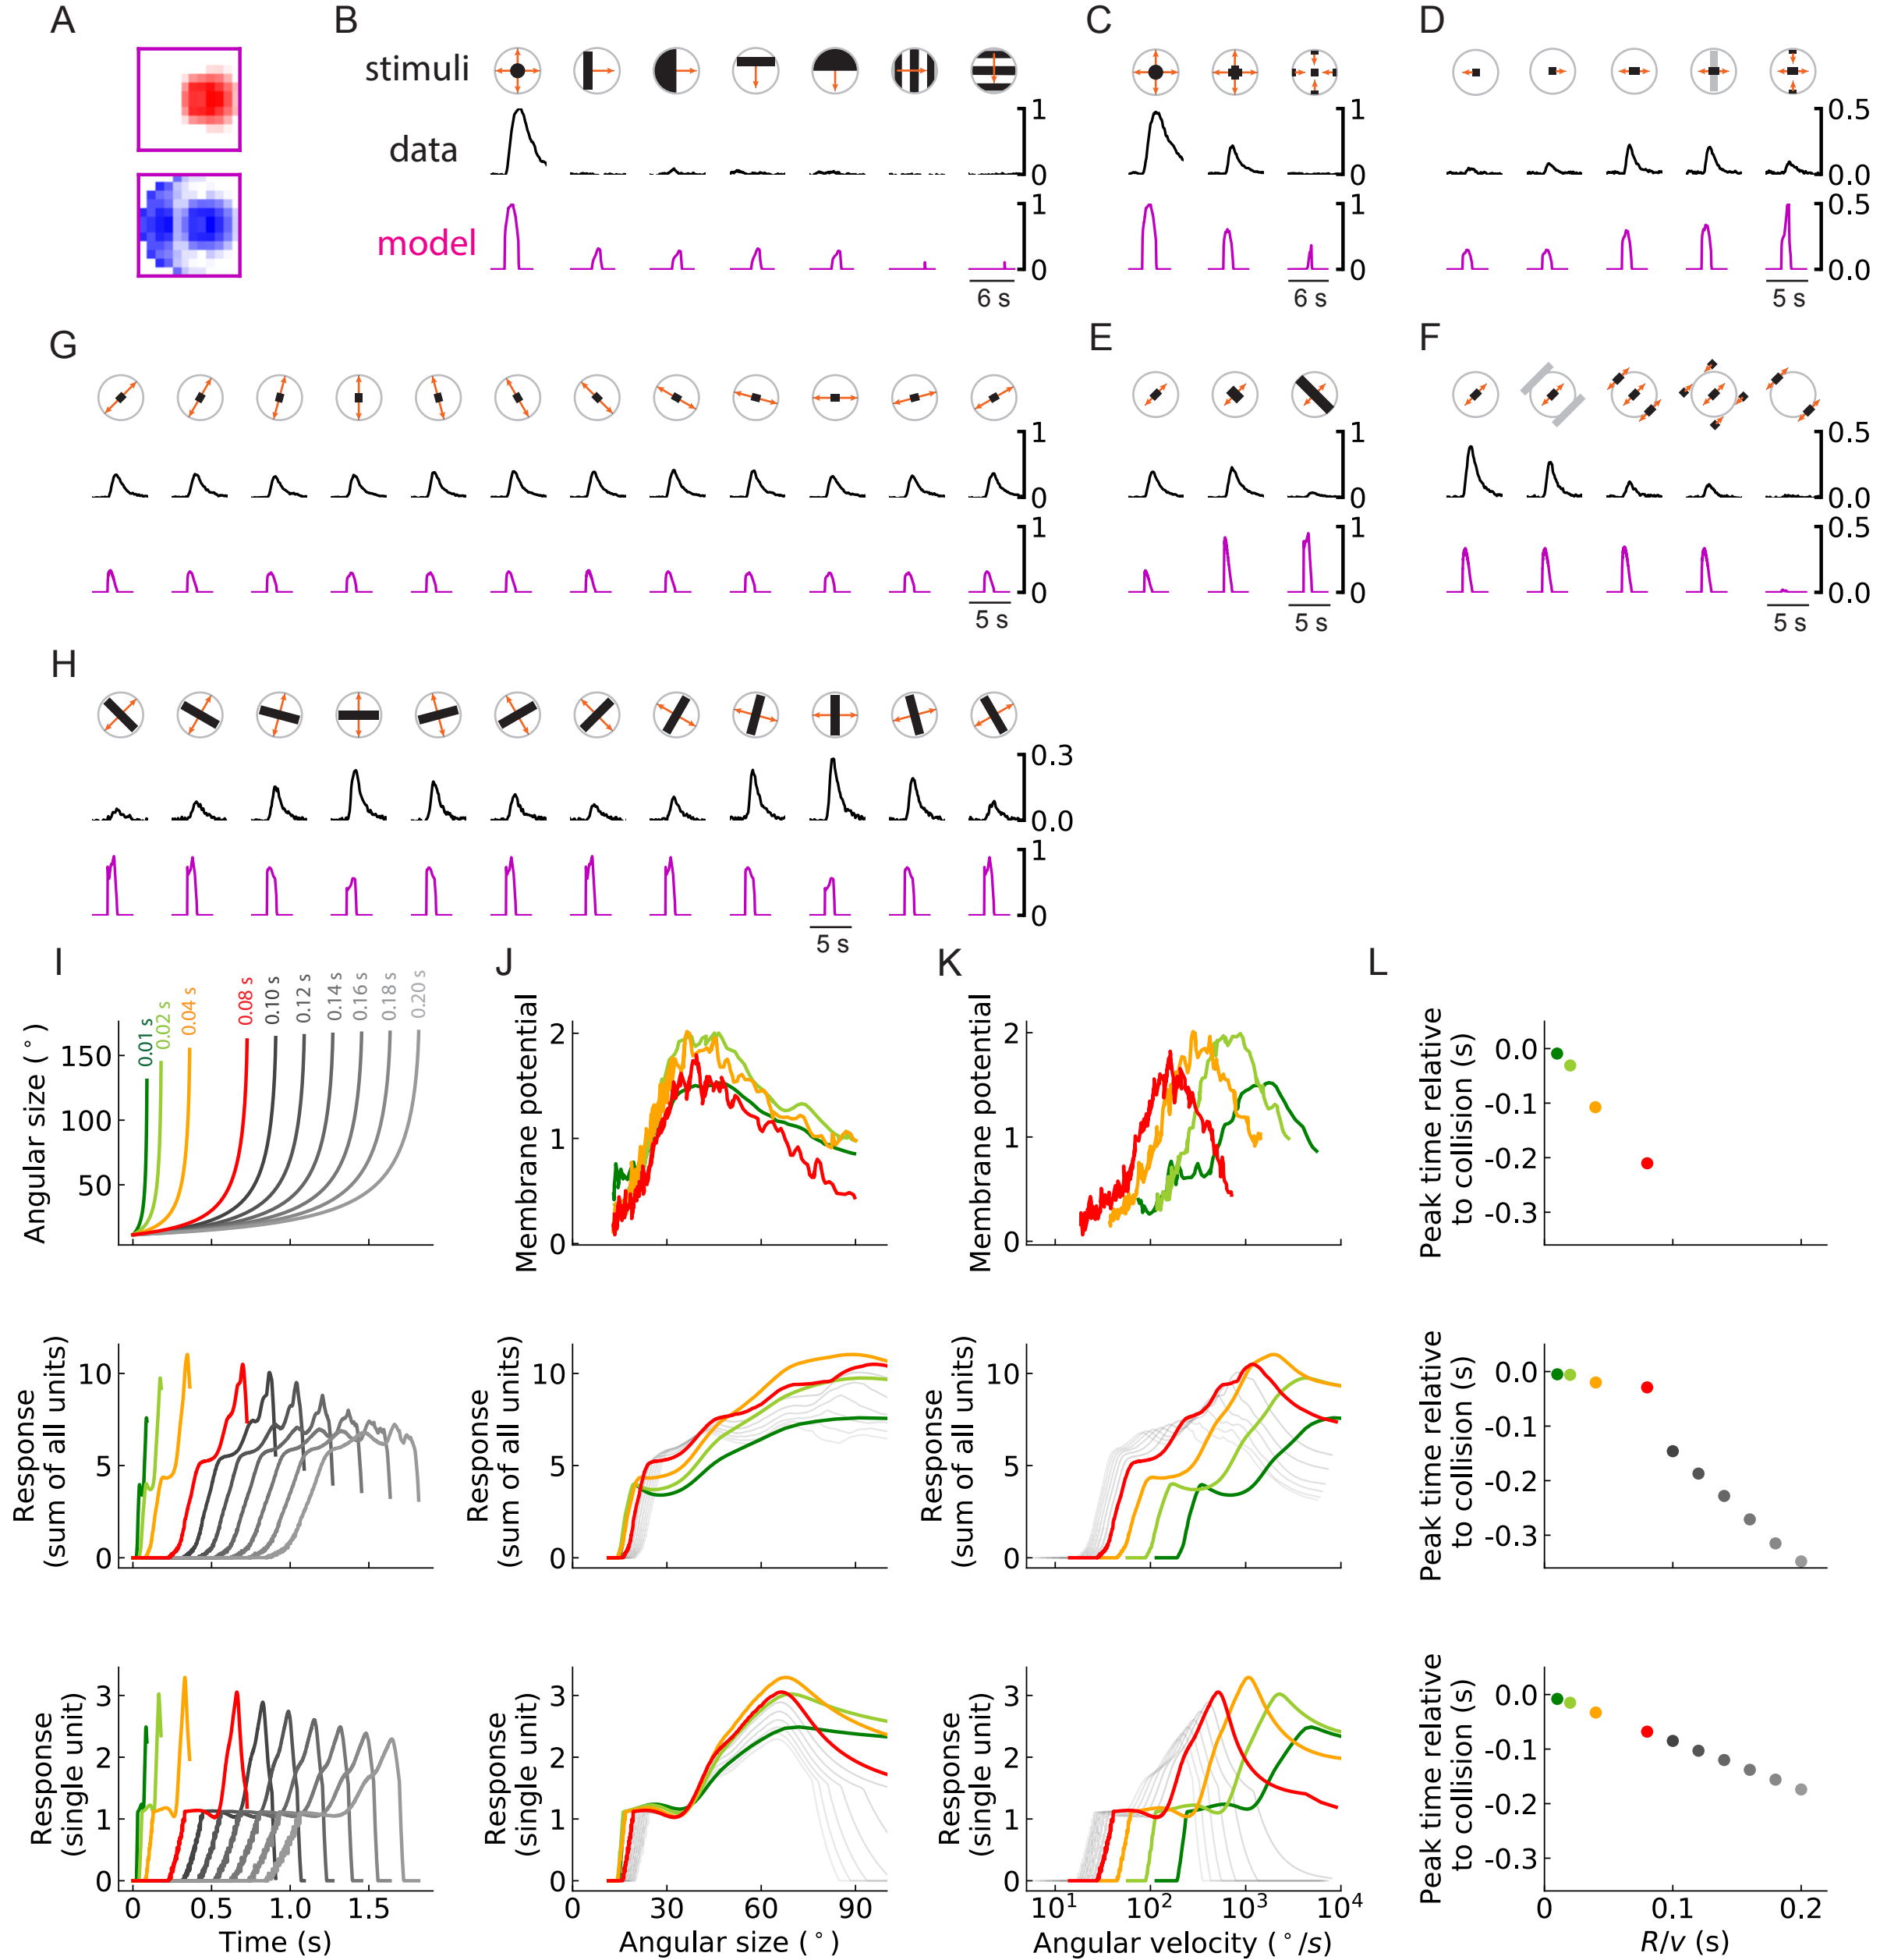

Supplement: supp [file elife-72067-supp-v1.zip]

A

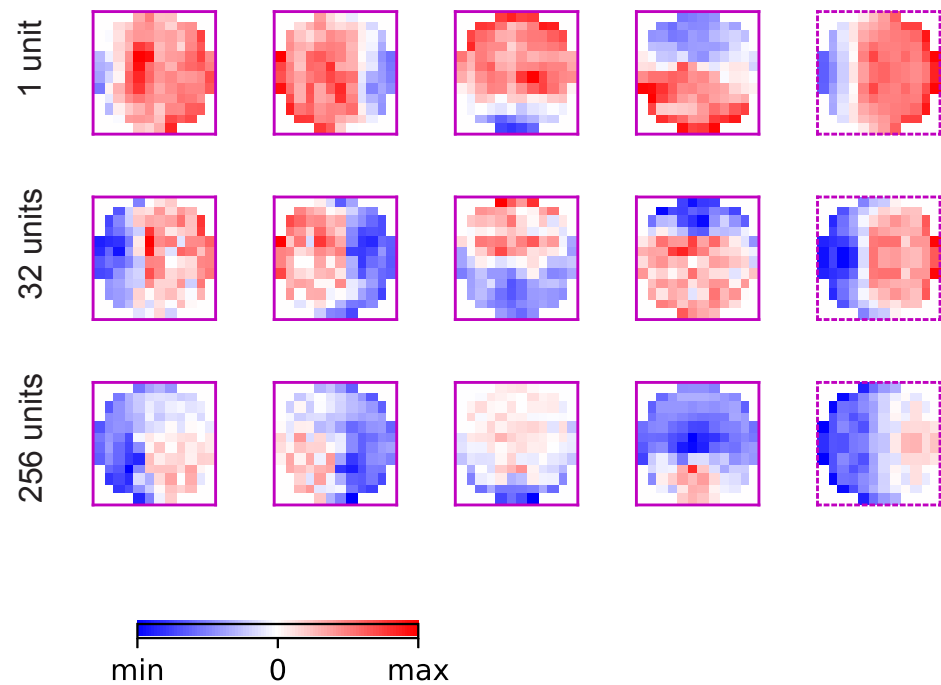

B

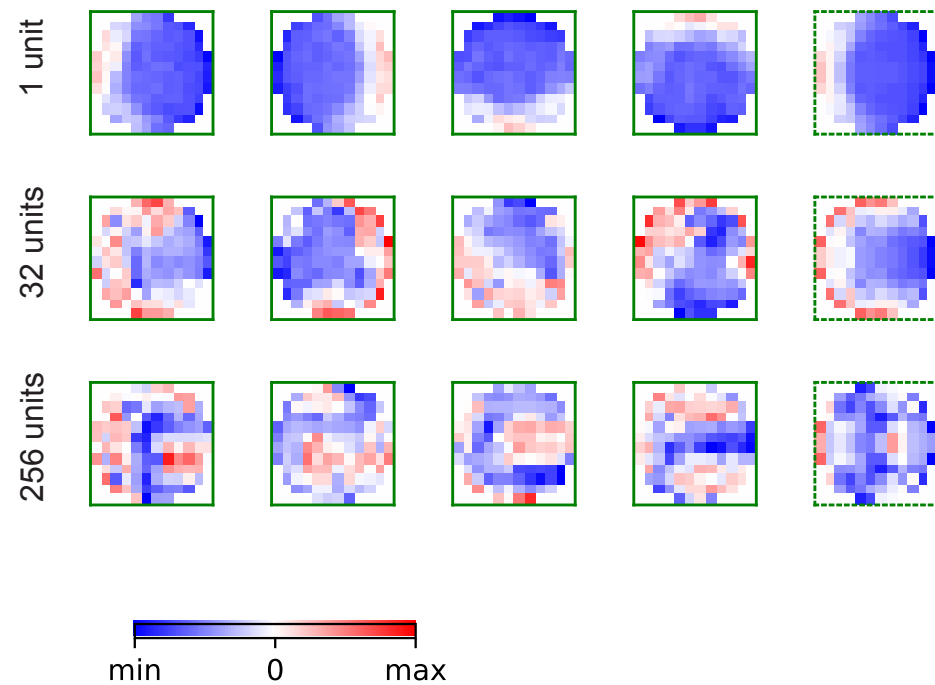

C

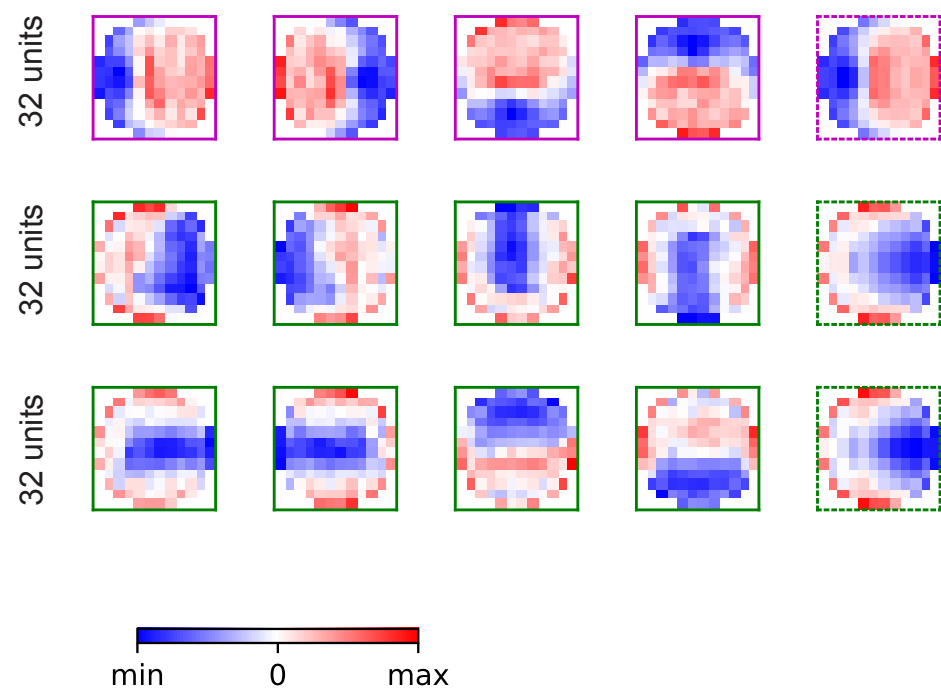

D

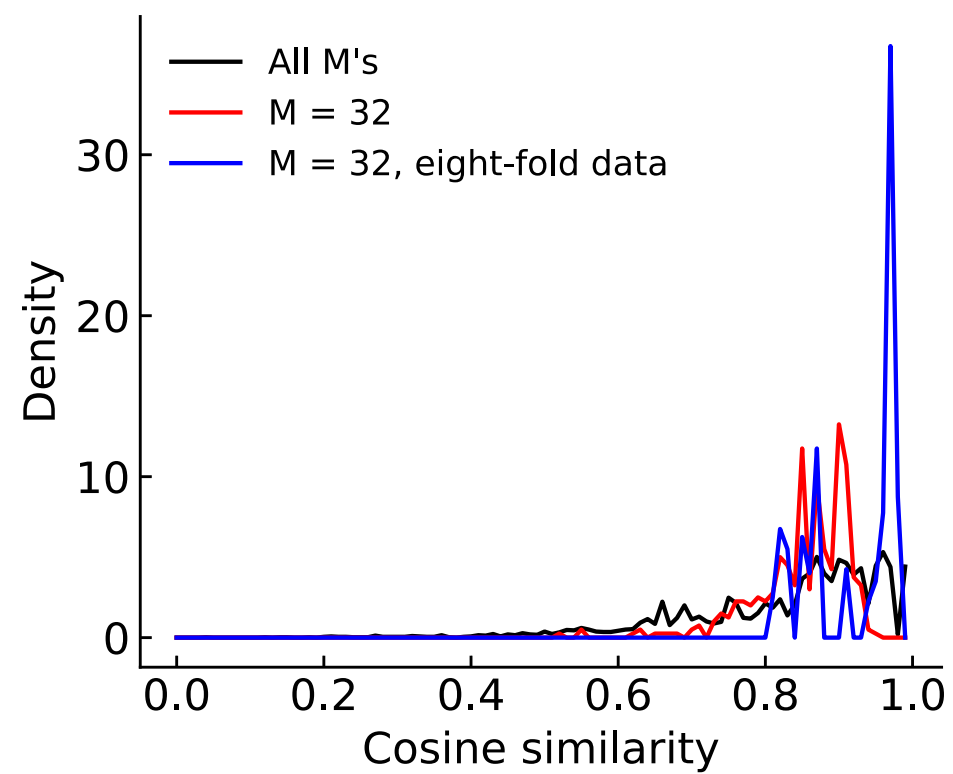

Supplement: supp [file elife-72067-supp-v1.zip]

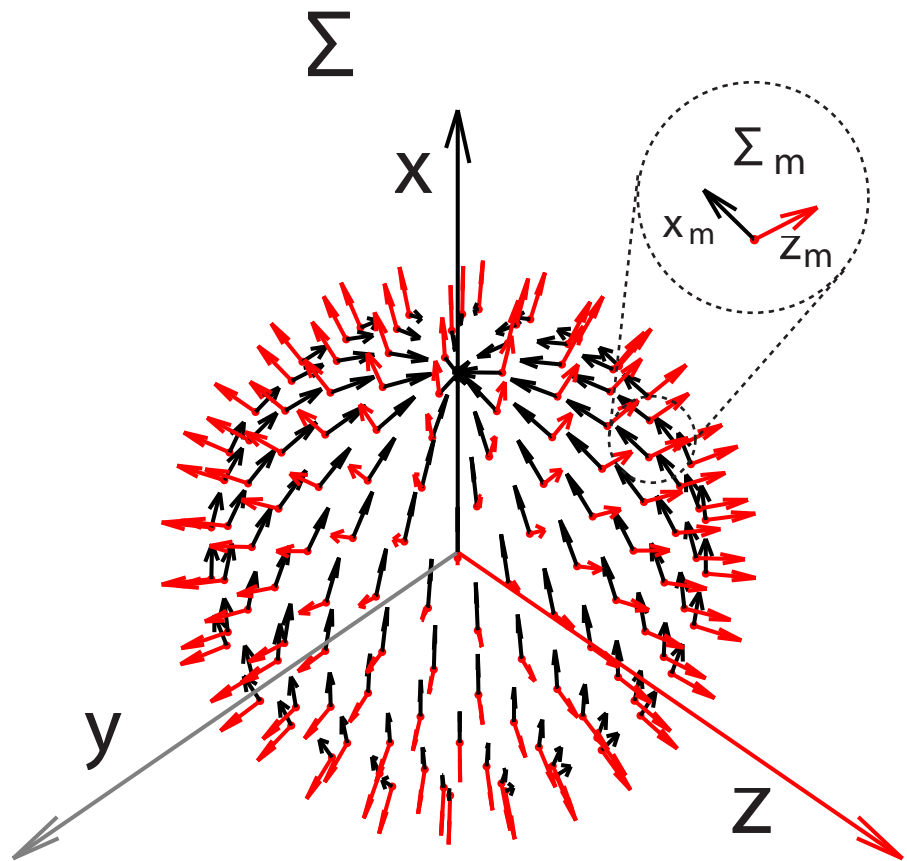

Supplement: supp [file elife-72067-supp-v1.zip › elife_poa_e72067_Figure_4_figure_supplement_1.pdf]

**A**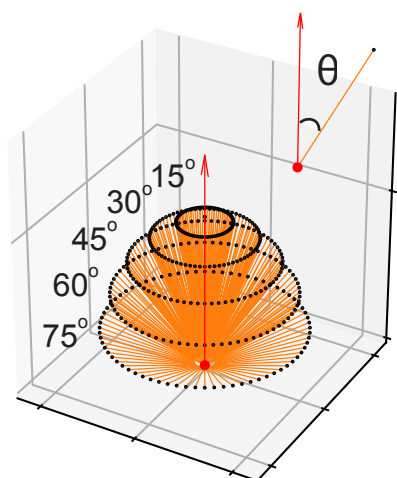**B**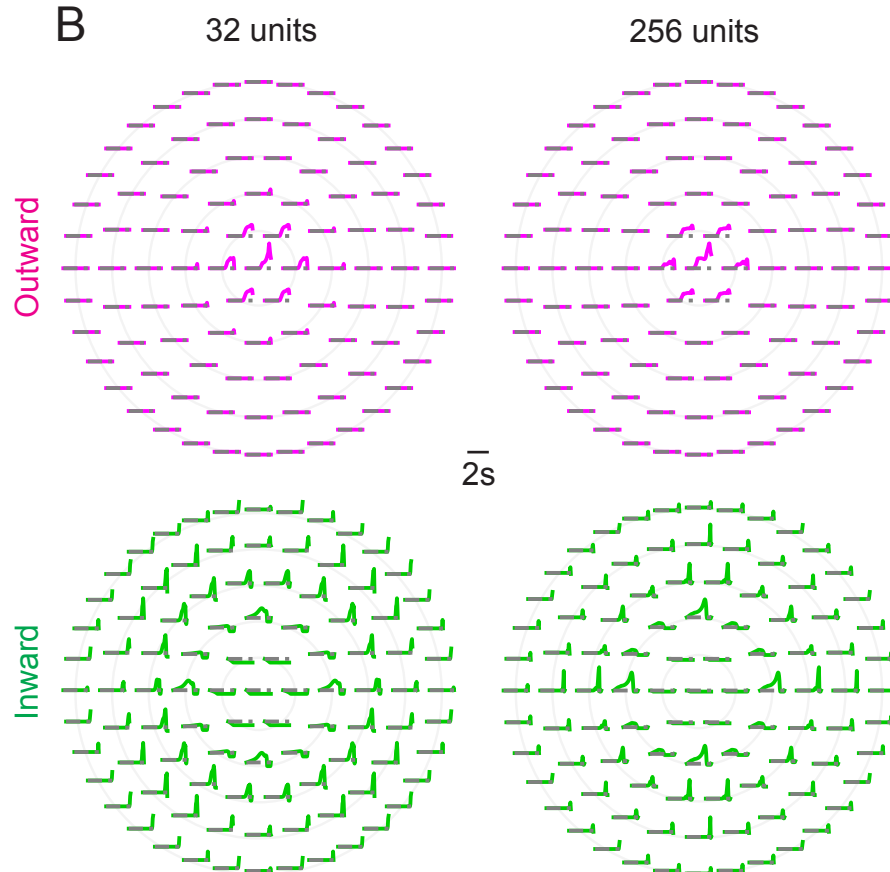**C**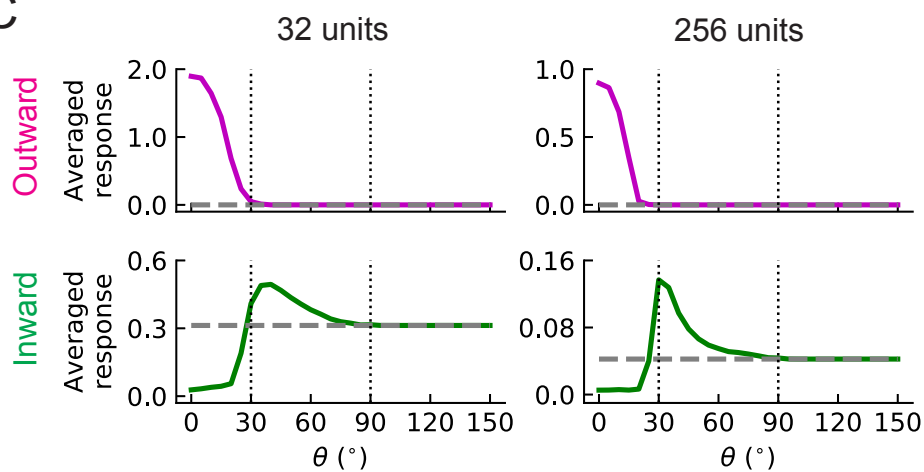**D**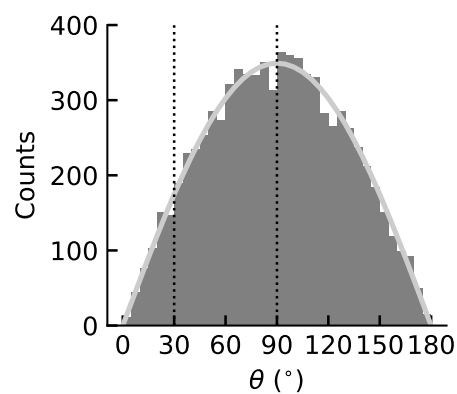**E**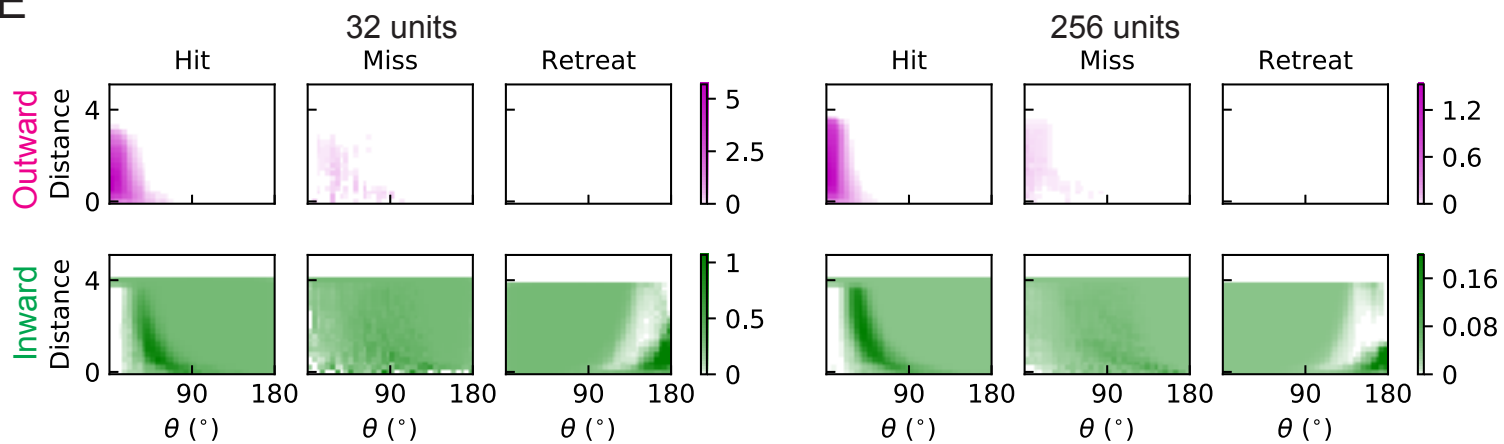

Supplement: supp [file elife-72067-supp-v1.zip › elife_poa_e72067_Figure_7_figure_supplement_1.pdf]

A

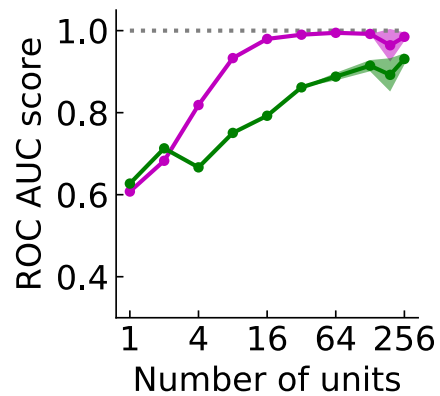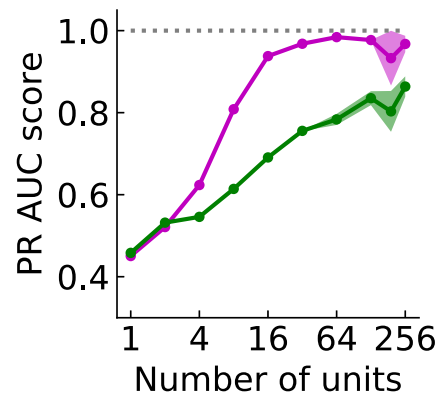

B

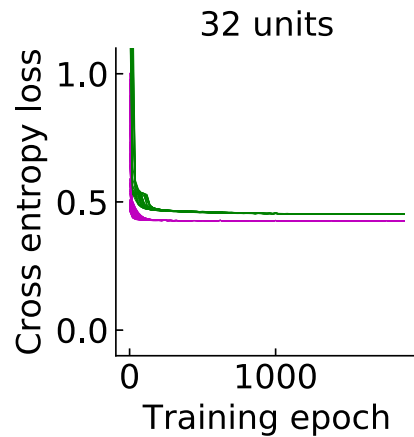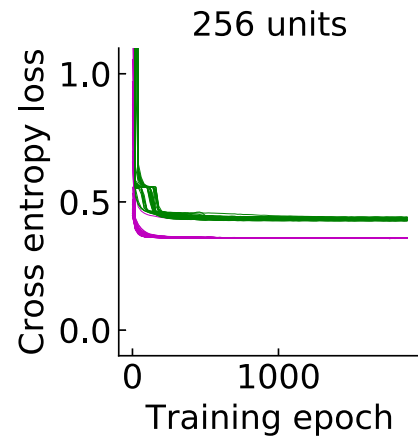

C

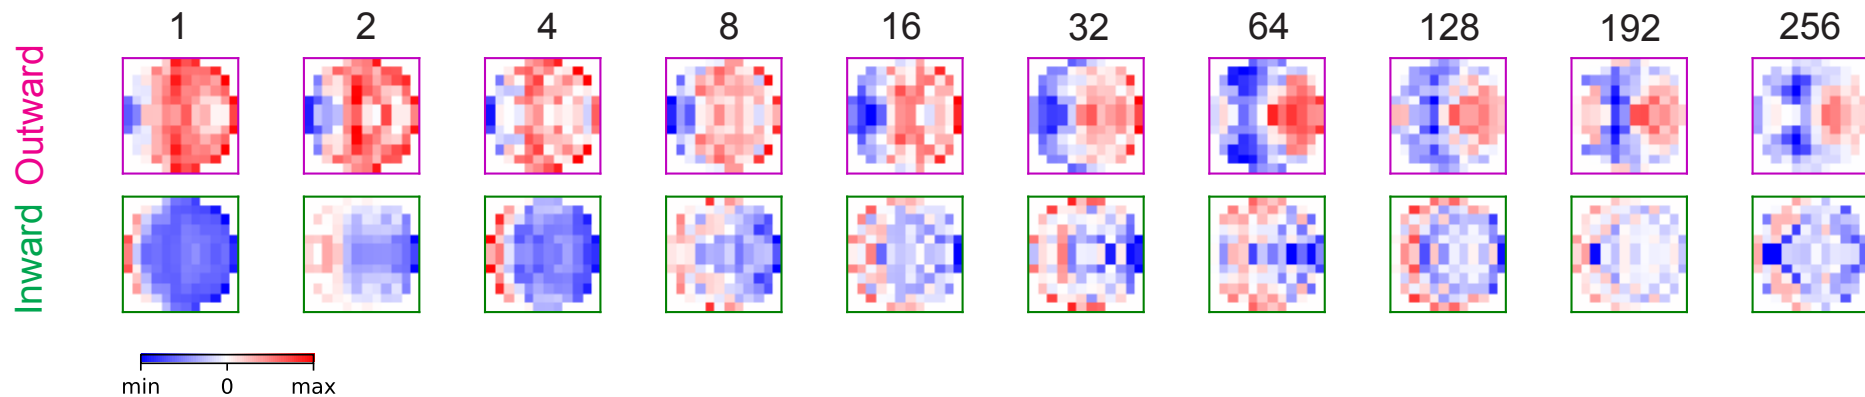

Supplement: supp [file elife-72067-supp-v1.zip › elife_poa_e72067_Figure_9_figure_supplement_3.pdf]

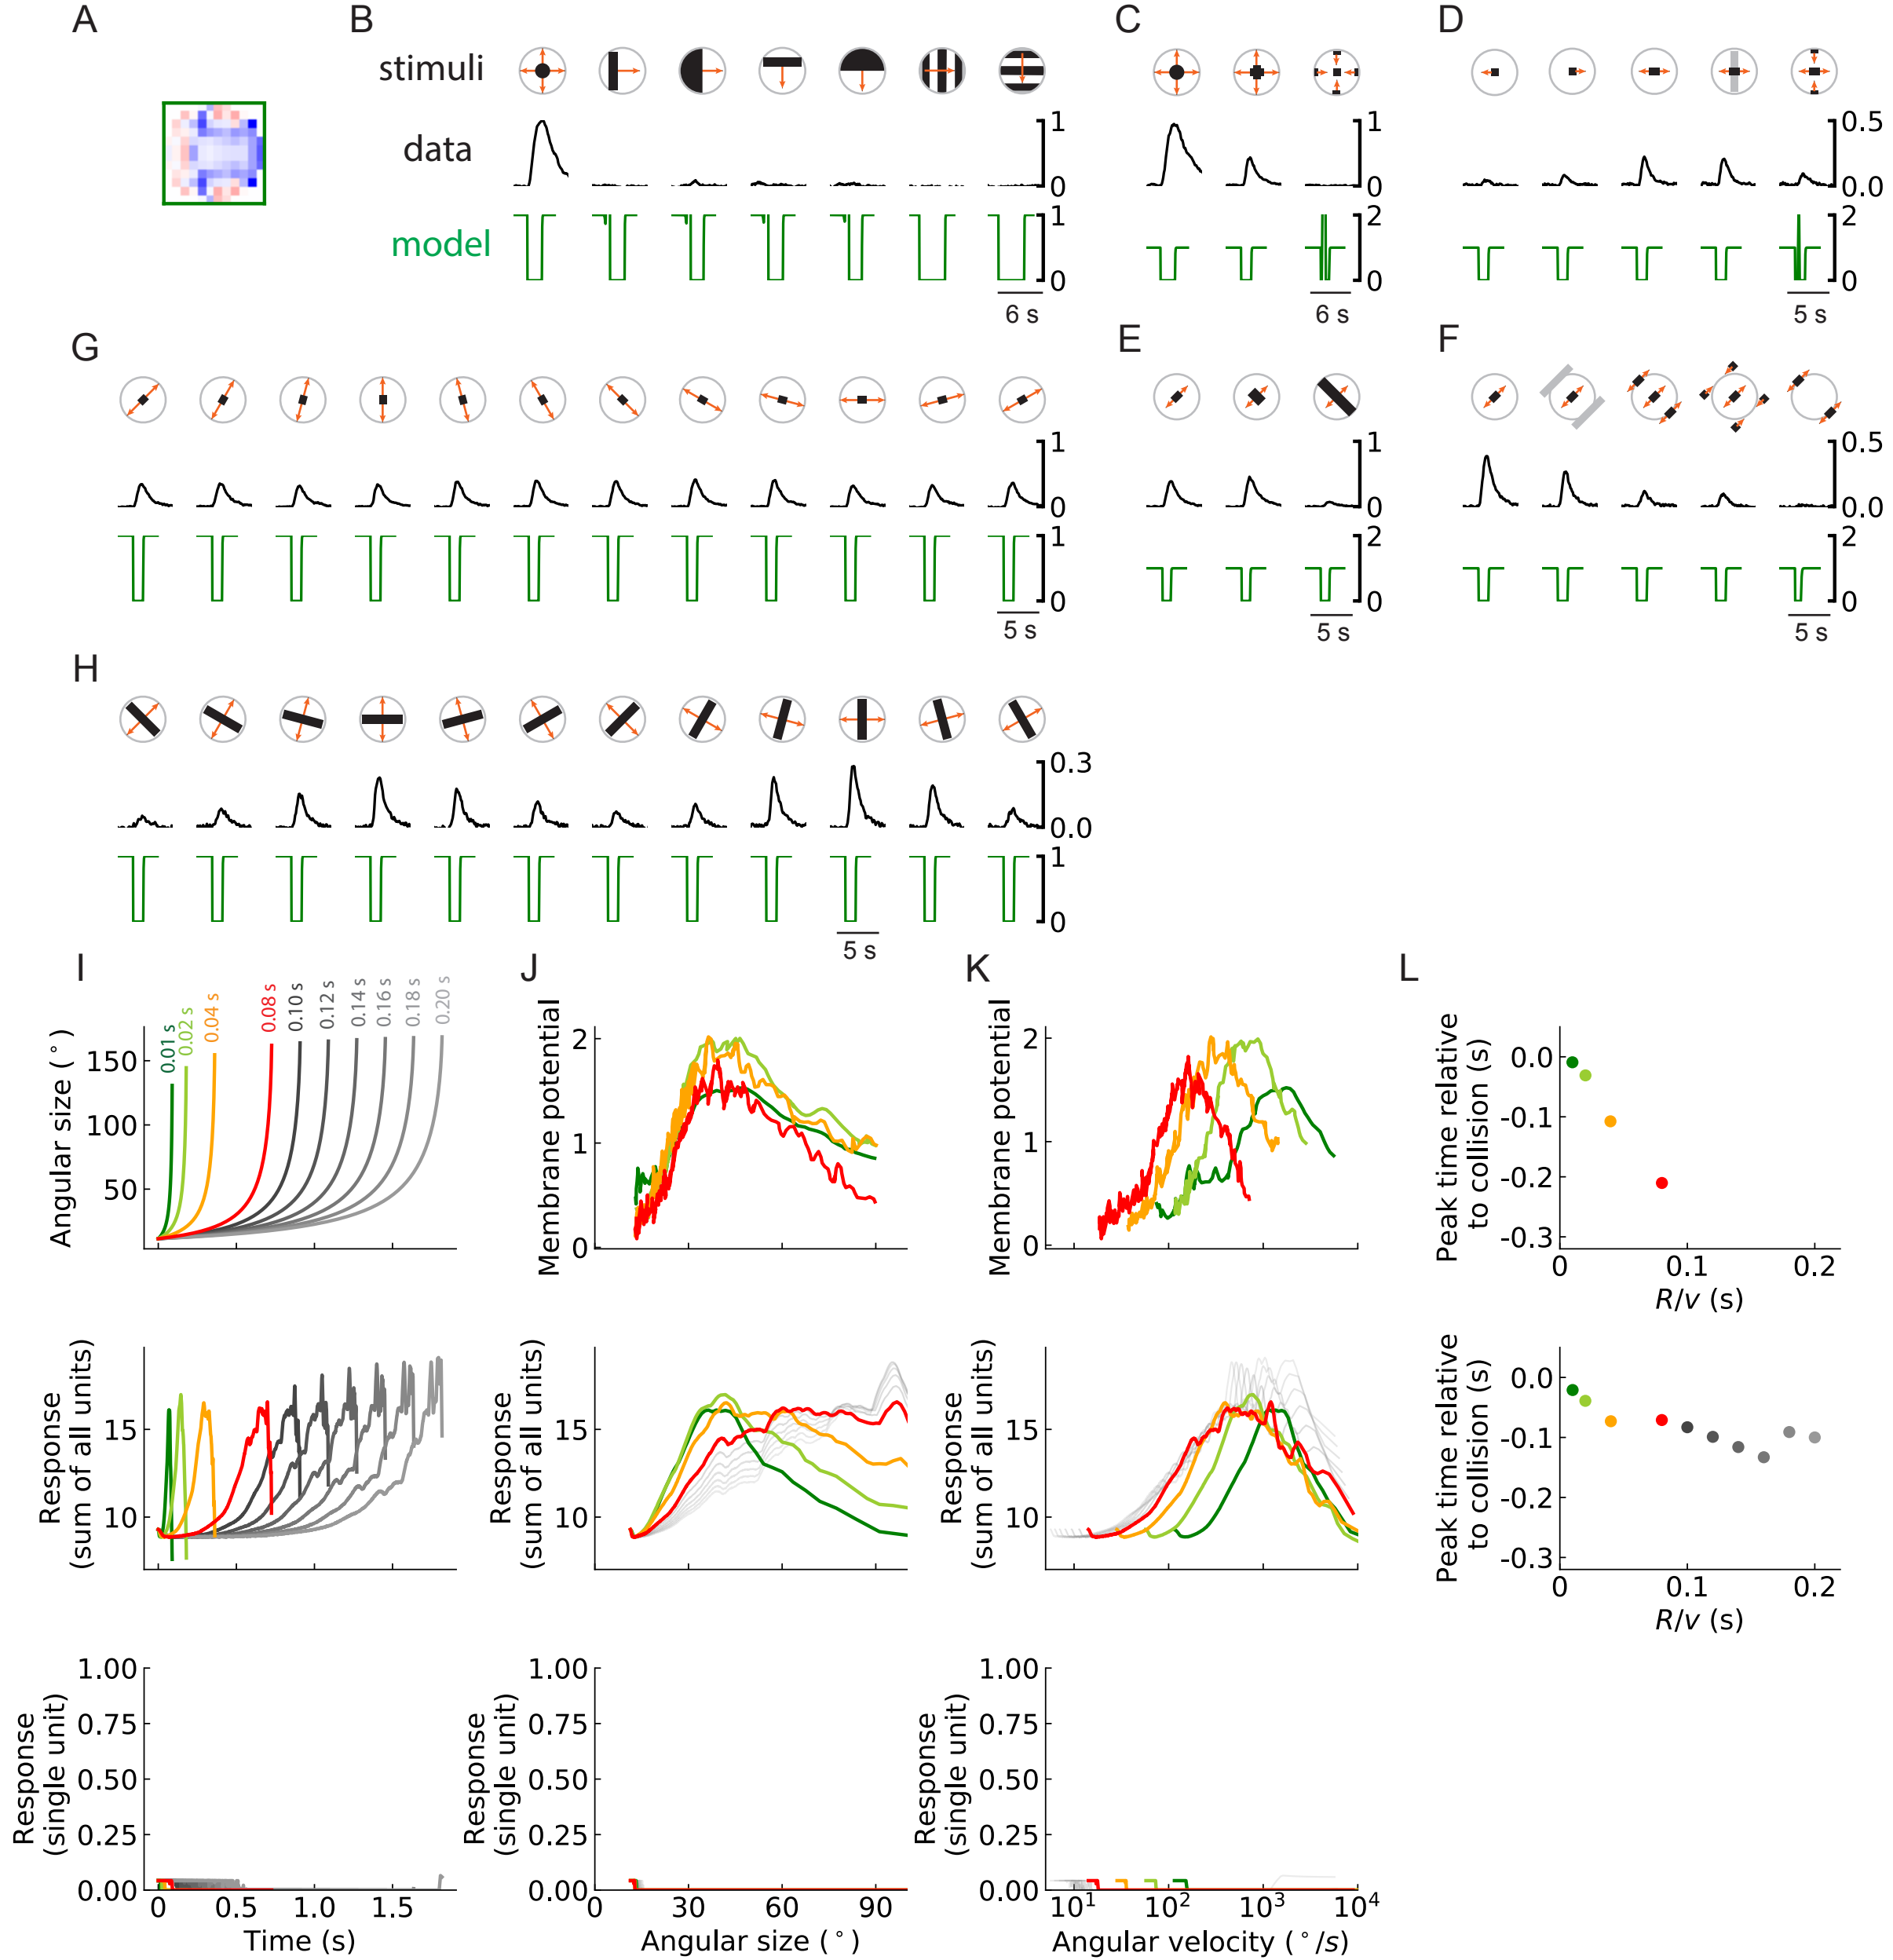

Supplement: supp [file elife-72067-supp-v1.zip › elife_poa_e72067_Figure_10_figure_supplement_1.pdf]
